# Supplementary material for: Horizontal ridging with mulching as the optimal tillage practice to reduce surface runoff and erosion in a Mollisol hillslope
Source: Copernicus journal article supplement (doi:10.5194/egusphere-2022-1526), 2023-01-23
Supplement: Supplementary file [file egusphere-2022-1526-AC1-supplement.pdf]

**Reply to comments of RC1: 'Comment on egosphere-2022-1526', Pedro Batista,  
01 Feb 2023**

**Dear reviewer Dr. Pedro Batista,**

We are very grateful to your constructive and helpful work and suggestions for our manuscript, egosphere-2022-1526. We are sure that your comments will greatly improve the quality of our manuscript. According with your further advices, we amended the relevant parts following your comments exactly. Revised portion are marked also in red in the revision this time. Comments were responded below one by one. We hope our revision would meet your request.

Thank you!

**general comments**

The manuscript describes the influence of different tillage practices on surface runoff and soil erosion in Mollisol maize plots, based on rainfall simulation experiments in Northeast China. Although I see the value in the research topic, I do not think this manuscript is ready to be considered for publication in SOIL. There is simply not enough information in the methodology to allow for a proper assessment of results. There are also multiple inconsistencies which, in my opinion, compromise the scientific quality of the manuscript.

For instance, the authors state that their first objective is to “identify influence of maize seedling canopy on soil loss”. However, canopy cover was apparently not measured by the authors, or at least this was not reported. Moreover, although the manuscript seems to focus on crop seedling stages, there is no information regarding the timing of the rainfall simulations in relation to the crop stage. That is, the date(s) of the rainfall simulation(s) is(are) not provided, not even the number of days after sowing. There is also no information about the number of rainfall simulations performed per treatment, nor the number of plots per treatment. Hence, I do not know what the treatment means and error bars refer to in figures 4 and 5. This compromises the interpretation of the statistical analysis presented by the authors.

Furthermore, the authors report data on droplet size and kinetic energy for the rainfall simulations, but there is no information about how this data were measured. Besides the missing information, some of the methods seem unusual or lack justification (see detailed comments below regarding the “pre-rain” 24 hours before the experiments and the “drying of the topsoil layer”). In addition, I found some of the information presented in the introduction to be somewhat imprecise or not sufficiently supported by references.

**A: Thank you for your professional and constructive comments and suggestion. You are right that the information of you point out were lack. In our revision, we replenished detail information about the time of simulation rainfall after maize seed sowed, the**

number of rainfall simulations performed per treatment, the measurement of droplet size and kinetic energy, pre-rain 24 hrs, and drying of the topsoil layer.

These and several other issues are listed in the detailed comments below.

### **Detailed comments**

Line 44: Please consider changing “soil layer thinning” to “soil thinning”.

A: Thank you for your professional suggestion. We changed it followed your suggestion as shown in line 43 in page 3.

Line 45: I suggest being more nuanced about crop yield losses associated to soil erosion (e.g., “and potentially to yield losses”).

A: Thank you for your suggestion. We changed ‘crop yield decline’ to ‘crop yield decline’ in line 44 in page 3.

Lines 46-48: Is the statement “Mollisol regions [...] are the major crop producing areas globally” accurate? I could not find the reference you provided (i.e., Zheng, 2020).

A: Yes, it is. The reference of Zheng edited in Chinese, and the detail information as shown in Lines 713-714 in page 24.

Lines 50-51: What is total soil loss area?

A: Thank you for your suggestion. We replenished the data of the total loss area in lines 49-50 in page 3.

Line 51: “Addressing soil erosion is important for soil loss reduction” seems redundant, please consider rephrasing.

A: Thank you for your suggestion. We replaced ‘soil erosion’ by ‘slope erosion’ in line 51 in page 3.

Lines 58-60: These statements sound strange to me (perhaps I misunderstood something). As far as I know, a very substantial amount of research has investigated interactions between vegetation and soil erosion, including at early crop development stages.

A: Thank you for your comment. Yes, there are large amounts of research on interactions between vegetation and soil erosion in the world, but we did not find a very substantial amount of research on soil erosion at early crop development stages from previous literature.

Line 62: Sorry, which region?

A: The region is the Northeast China as we mentioned in line 49. And, we also supplied the information in line 61 in page 3.

Lines 61-63: I had a hard time understanding this. Are the rainfall simulation studies related to the ones during the rainy season? Also, which rainy season? For which region?

A: Thank you for your comment. Yes, the rainfall simulation studies related to the ones during the rainy season as we cited the four references of Li et al., 2016; Liu et al., 2011; Lu et al., 2016; Xu et al., 2018. The rainy season is from July to September in the northeast China as we described in line 62 in page 3. We supplied the detail information of the region in line 61 in page 3.

Line 67: Do you mean soil water holding capacity? How is Figure 1 illustrating this statement?

A: Thank you for your comment. We deleted poor soil holding capacity because figure 1 can not illustrated this statement of soil holding capacity.

Lines 76-81: Please consider rewriting this paragraph.

A: Thank you. We rewrote this paragraph as shown in lines 76-81 in page 4.

Line 94: Could you please revise this sentence? By reading this I would understand the total soil depth is 30 cm, but I reckon this is not the case.

A: Thank you. We rewrote this sentence as shown in lines 94-95 in page 5.

Line 102: I am not familiar with the term “agglomerate impurities” in this context. Could you please explain/reformulate?

A: Thank you. We changed ‘agglomerate impurities’ to ‘impurities’ in 101 in page 5.

Lines 103-106: Sorry, but I did not understand this part of the methods. Could you reformulate?

A: Thank you. We rewrote this sentence as shown in lines 102-103 in page 5.

Line 107: Variety or cultivar?

A: Thank you for your professional comment. We changed ‘variety’ to ‘cultivar’ in line 104 in page 5.

Line 110: The “Flat-planting plots” had not been mentioned in the text yet, so I do not know what you are referring to here.

A: Thank you. We move them to lines 115-118 in page 6.

Line 122: How many plots?

A: There are 6 treatments and 18 plots. We replenished the detail information in lines 119-120 in page 6.

Line 125: Are you sure that one hour of rainfall with  $100 \text{ mm hr}^{-1}$  intensity is representative of rainfall patterns in your study area?

A: Yes, we are sure that one hour of rainfall with  $100 \text{ mm hr}^{-1}$  intensity is representative of rainfall patterns in our study area as the two references Xu et al. (2018) and Wang et al. (2021a) reported.

Line 127: How many plots? When were the simulations performed? How many days after sowing? Do you have information on canopy cover and plant height?

A: There are 6 treatments and 18 plots. We replenished the detail information in lines 119-120 in page 6. All simulated rainfall experiments started from July 19, 2013, after 40 days of sowing, and we added this information in lines 106-107 in page 5. It is a pity, we did not measure canopy cover and plant height of maize plants.

Lines 127-130: How does pre-rain at  $30 \text{ mm hr}^{-1}$  for 5 min 24 hours before the experiments ensure consistent soil moisture?

A: The pre-rain duration of 5 min is our lab experience as reported in Zhang et al. (2009b).

Line 131: How did you dry the topsoil layer after the experiments? This sounds a bit odd, maybe I misunderstood something. Also, what do you mean by rainfall event? Do you mean the simulation? I am sorry, but I find your methods difficult to understand (description- and rationale-wise).

A: We meant that the dry topsoil layer is removing waterproof canvas ceiling and surround canvases after each rainfall, and then sun and wind would dry the plots, we added the information in line 130 in page 6. We replaced rainfall event to rainfall simulation as shown in line 129 in page 6.

Line 151: As far as I understand, splash erosion would start as soon as the rainfall simulation begins. Moreover, how many rainfall simulations did you perform for each treatment?

A: Thank you for your professional comments. Yes, we start splash erosion at the rainfall simulation begins and hold about 15 min, we supplied the information in lines 150-151 in page 7. We repeated three times for each treatment.

Line 153: I found the statistical analyses difficult to understand without information regarding the number of plots and the number of rainfall simulations per treatment. That is, what are the “treatment means” you refer to? Also, what are the treatments? That is, how did you account for the interactions between tillage type, ridging direction, and rainfall intensities?

A: Thank you for your professional comments. We replenished the information as you pointed as shown in lines 119-120 in page 6. And, we did not analyze the interactions between tillage type, ridging direction, and rainfall intensities in this manuscript.

Lines 160-161: This is the first time you mention the measurement of raindrop energy and size distribution. How did you measure these? Shouldn't this information be in the methods?

A: Yes, you are right. Thank you for your suggestion. We supplied the information of the measurement of raindrop energy and size distribution as shown in lines 153-160 in page 7.

Lines 163-166: I found this very confusing. Please consider reformulating.

A: we rewrote the sentence as shown in lines 171-175 in page 8.

Lines 168-169: Do you think antecedent soil moisture might influence the time to the beginning of runoff?

A: Yes, you are right. Thank you for your professional comments. Yes, the antecedent soil moisture can influence the time to the beginning of runoff. But we think the influence would be same in our experiment.

Line 173: 23.8-fold is difficult to understand, please consider giving the actual time to runoff for the CK treatment.

A: Thank you. We replaced fold to times as shown in lines 182-183 in page 8.

Lines 174-175: Are these times to runoff referring to which rainfall intensity?

A: Thank you. We mean that the two rainfall densities.

Lines 190-191: Did these low runoff amounts cause the rupture of the ridges? Is this correct?

A: Yes, you are right. Thank you. Yes, we think low runoff amounts is one of the reasons cause the rupture of the ridges, which means that more rainfall water infiltration in soil and cause soil saturation, and damage soil structure, then make ridges rupture.

Lines 197-198: Augmented the soil loss in comparison to CK?

A: Yes, all soil loss were compared with CK.

Furthermore, we corrected the wrong expression of control and replaced it by CK in figures 4-7 in revision, improved the resolution of figure8, and the all 5 figures were replaced by new version.

Thank you again for your care and patience, and your professional and constructive comments and suggestion.

Please do not hesitate to contact us if you have any more comments and suggestion.

Best wishes,

Dr. Prof. Yubin Zhang

ybzhang@jlu.edu.cn

1 **Horizontal ridging with mulching as the optimal tillage practice to reduce surface**  
2 **runoff and erosion in a Mollisol hillslope**

3 Running title: Horizontal ridge with mulching reduces surface runoff and erosion

4 Yucheng Wang<sup>1, †</sup>, Dayong Guo<sup>2, †</sup>, Zheng Li<sup>1</sup>, Wuliang Shi<sup>1</sup>, Bin Li<sup>1</sup>, Liyuan Hou<sup>1</sup>, Yi Zhang<sup>1</sup>, Jinhua  
5 Cui<sup>1</sup>, Ning Cao<sup>1, \*</sup>, and Yubin Zhang<sup>1, \*</sup>

6 <sup>1</sup> College of Plant Science, Jilin University, Changchun 130062, China

7 <sup>2</sup> Agricultural College, Henan University of Science and Technology, Luoyang 471000, China

8 †, contribution equally to this work

9 \*, Correspondence

10 Ning Cao and Yubin Zhang, College of Plant Science, Jilin University, Changchun 130062, China.

11 E-mail: cao\_ning@jlu.edu.cn; ybzhang@jlu.edu.cn

12 ORCID

13 Yucheng Wang, <https://orcid.org/0000-0002-7838-226X>

14 Wuliang Shi, <https://orcid.org/0000-0002-8023-1807>

15 Yubin Zhang, <https://orcid.org/0000-0003-4920-3100>

16 **ABSTRACT**

17 Soil erosion features and ideal tillage practices are not very clear at the crop seedling stage in Chinese  
18 Mollisols. Simulated rainfall experiments were conducted at the rainfall intensities of 50 and 100 mm  
19 h<sup>-1</sup> to investigate the differences in soil erosion of a 5° hillslope during the maize seedling stage  
20 between conservation and conventional tillage measures, including cornstalk mulching (Cm),  
21 horizontal ridging (Hr), horizontal ridging + mulching (Hr+Cm), vertical ridging + mulching  
22 (Vr+Cm), flat-tillage (CK), and vertical ridging (Vr). The results demonstrated that crops could remit  
23 soil erosion at the seedling stage by reducing the kinetic energy and changing the distribution of  
24 raindrops. The conservation tillage measures significantly alleviated total runoff (11.7%–100%) and  
25 sediment yield (71.1%–100%), postponed runoff-yielding time (85 s–26.1 min), decreased runoff  
26 velocity (71.5%–96.7%), and reduced runoff and soil loss rate, compared to the conventional tillage  
27 measures. Practices with mulching showed better performance than Hr. **Mulching reduced sediment**  
28 **concentration (~70.6%–100%) by decreasing runoff velocity and soil particle filtration.** The contour  
29 ridge ruptured earlier at 100 mm h<sup>-1</sup> than at 50 mm h<sup>-1</sup> and changed the characteristics of the soil  
30 erosion by providing a larger sediment source to the surface flow. Runoff strength, rather than soil  
31 erodibility, was the key factor affecting soil erosion. Decreasing runoff velocity was more important  
32 than controlling runoff amount. The Hr + Cm treatment exhibited the lowest soil erosion and is, thus,  
33 is recommended for adoption at the corn seedling stage in sloping farmlands.

34

35 **KEYWORDS**

36 soil erosion, conservation tillage, Mollisols, maize seedling stage, rainfall simulation, rainfall  
37 intensity



## 38 Introduction

39 Soil erosion has been accelerated by unsustainable agricultural practices (FAO, 2019), with an  
40 associated annual loss of \$8 billion to the global GDP, global agri-food production by 33.7 million  
41 tons, and 48 billion m<sup>3</sup> water (Sartori et al., 2019). Sloping farmlands are considered as the main sites  
42 of soil erosion worldwide (Ge et al., 2021; Haddadchi et al., 2019). With the removal of fertile soil  
43 surface layers following intensive tillage, soil erosion leads to **soil thinning**, soil quality degradation,  
44 and **potentially to yield losses** (DeLonge and Stillerman, 2020; Liu et al., 2013).

45 Mollisols regions, which are found in flat to undulating land (Chesworth, 2008), are the major  
46 crop production areas globally while experiencing severe soil erosion from the 1930s to date due to  
47 overexploitation (Zheng, 2020). Expansive acres of maize (*Zea mays* L.) are grown on slopes (You et  
48 al., 2021) due to the naturally fertile mollic epipedon and high productivity in the Mollisols of  
49 Northeast China (Zhao et al., 2015), which account for 46.39% of the total soil loss area, **about 21.87**  
50 **×10<sup>4</sup> km<sup>2</sup>**, in the region (MWR, 2020). Hence, addressing **slope erosion** is important for soil loss  
51 reduction, aquatic ecosystem conservation, and agricultural sustainable development in the region.

52 Conservation tillage is one of the widely used agronomic measures worldwide to control soil  
53 erosion (Bombino et al., 2021; Busari et al., 2015; Kader et al., 2017; Lal, 2018). Compared with  
54 conventional tillage approaches, conservation tillage improves soil physical characteristics (Blanco-  
55 Moure et al., 2012), soil fertility (Van den Putte et al., 2012), and agricultural productivity (Hansen et  
56 al., 2012).

57 Few studies have explored the active influences of crops on soil erosion, especially at the seedling  
58 stage (Cerdà et al., 2017; Prosdocimi et al., 2016b; Wang et al., 2018), although some previous studies  
59 have demonstrated the significant and positive effects of vegetation on soil erosion (Huang et al., 2014;  
60 Wang et al., 2021b). In addition, although some reports have explored the effects of conservation  
61 tillage on soil erosion by simulating rainfall in **Northeast China**, they have focused on bare slopes or  
62 have been limited to the rainy season from July to September (Li et al., 2016; Liu et al., 2011; Lu et

63 al., 2016; Xu et al., 2018). The status of soil erosion at the crop seedling stage under different tillage  
64 practices has rarely been explored (Ma et al., 2013). Sloping farmland is susceptible to soil erosion at  
65 the seedling stage (Zhang et al., 2010) for various reasons **as low vegetation cover** (Figure 1) (Wang  
66 et al., 2018; Zhang et al., 2009) with the advance of precipitation concentration period (Liu et al., 2018;  
67 Sun et al., 2000;).

68 The objectives of the present study were to 1) identify influence of maize seedling canopy on soil  
69 loss and 2) evaluate the effects of four conservation tillage and two conventional tillage practices on  
70 soil erosion under simulated rainfall conditions on a black soil sloping farmland. The results of the  
71 present study could provide insights on the optimal tillage approaches at corn seedling stages in  
72 Mollisol regions, which could facilitate soil erosion control measures in such regions.

## 73 **Materials and Methods**

### 74 **Study area and rainfall simulation**

75 The experiments were conducted at artificial rainfall simulation plots at the Science and  
76 Technology Park of Soil and Water Conservation (127°25'35.8788"E, 45°45'22.3308"N), Institute of  
77 Soil and Water Conservation of Heilongjiang Province, Binxian County. There is the typical Mollisol  
78 region, gentle (1-8°) and long slopes (~400-1000 m) are the key topographical features, in Northeast  
79 China. Annual average precipitation is 548.5 mm and 64% of the precipitation concentrated in July to  
80 September (MWR, CAS, and CAE, 2010).

81 The rainfall simulation device adopted is composed of a water storage system, a control system,  
82 and a sprinkler system (Wen et al., 2012). The sprinkler system is erected 6-m from the ground. A full-  
83 jet down-sprinkler rainfall simulator (Spraying Systems Co., Wheaton, IL USA) with three nozzle  
84 sizes (Fulljet 1/8, 2/8, and 3/8) was used to apply rainfall. Rainfall intensity can be adjusted from 20  
85 to 150 mm h<sup>-1</sup>. Wen et al. (2012) reported that the uniformity coefficient of rainfall intensities from 30  
86 mm/h to 90 mm/h was ~0.90. The control system is a HLJSB-J artificial rainfall simulation system  
87 (Institute of Soil and Water Conservation of Heilongjiang). A removable waterproof canvas ceiling

88 was used protect all experimental plots from natural rainfall, and a set of droppable canvases were  
89 used to surround the testing plots to eliminate the impacts of wind (Figure 2 and 3).

## 90 **Preparation of experimental plots**

91 The plots used in the present study were 10 m long and 1 m wide. The slope of the plots was set  
92 to 5° to simulate the typical natural geomorphological conditions in farmlands in the region (Zhao,  
93 1986). **The tested soil depth was 0.3 m, similar to the average A-horizon layer of black soil in Binxian**  
94 **county** (Xu et al., 2010). The black soil layer was followed by a 0.3-m sand layer.

95 The used soil was Phaeozems (IUSS Working Group WRB, 2015), same as typical black soil  
96 (CRGCST, 2001) or mollisol (Soil Survey Staff, 1999), with 22.01 g kg<sup>-1</sup> of organic matter and  
97 approximately 7.9% sand, 54.4% silt, and 37.7% clay, determined using the potassium dichromate  
98 oxidation-external heating method and density method with variable depth, respectively (Pansu and  
99 Gautheyrou, 2005). The soil was collected from the top-30-cm soil layer in a local sloping farmland.  
100 **Impurities** were removed manually, but without passing the soil through a sieve, to maintain its natural  
101 status. **The soil was packed into plots with bulk density of 1.20 g cm<sup>-3</sup> on the sand layer for 1.5 years**  
102 **to ensure that the plots reached the field level by natural deposition before this experiment.**

103 We used Xianyu 335 maize **cultivar** (DuPont Pioneer Ltd., USA), a widely cultivated **cultivar** in  
104 Northeast China (Liu et al., 2021). Seeds were sown with 0.4-m spacing between rows and 0.2-m  
105 spacing between plants, and fertilized with urea (CO<sub>2</sub>(NH<sub>2</sub>)<sub>2</sub>) at 150 kg ha<sup>-1</sup> on June 9, 2013. **All**  
106 **simulated rainfall experiments started from July 19, 2013.**

## 107 **Experimental design and procedures**

108 In the present study, two tillage systems, conventional and conservation, were selected based on  
109 the widespread tillage practices in the study region (Jia et al., 2019; Wang, 2015; Zhang et al., 2015),  
110 and which also are applied globally (Liniger et al., 2017; Montgomery, 2017). The two conventional  
111 tillage practices included flat-planting without ridges and mulching (control, CK) and vertical ridging  
112 without mulching (Vr). The four conservation tillage measures included flat-planting and mulching

113 without ridges (Cm, similar to no-till to some extent, Goddard et al., 2008), horizontal (contour)  
114 ridging without mulching (Hr), horizontal ridging with mulching (Hr+Cm), and vertical ridging with  
115 mulching (Vr+Cm). All plots, excluding the flat-planting plots, were plowed simultaneously at ~0.2 m  
116 depth. Ridges, 15 cm high and 15 cm wide, were stacked in all ridging plots one month after sowing  
117 based on the local methods (Wang, 2015). Air seasoning maize stalks were chopped into approximately  
118 5-cm fragments and mulched onto mulching plots at a rate of 20 000 kg ha<sup>-1</sup>. All plots were randomly  
119 arranged and repeated three times (Figure 2), and the simulation rainfall also repeated three times.

120 In terms of rainstorm status, generally momentary rainfall intensities larger than 23.4 mm h<sup>-1</sup> cause  
121 soil erosion with an approximate duration of 1 h in Northeast China (Zhang et al., 1992). In the present  
122 study, two rainfall intensities, 50- and 100-mm h<sup>-1</sup>, lasting 1 h, were used as representative rainfall  
123 intensities (Xu et al., 2018; Wang et al., 2021a).

124 All plots were subjected to a pre-rain at 30 mm h<sup>-1</sup> for 5 min to ensure consistent soil moisture  
125 during experiments, consolidate loose soil particles, and flatten the soil surface, 24 h before  
126 experiments; rainfall intensity was calibrated to ensure the achievement of target intensity and  
127 fulfillment of experimental requirements (uniformity  $\geq 90\%$ , Figure 3a) before the experiment (Zhang  
128 et al., 2009b). After each rainfall simulation, the plots were restored via a process including drying  
129 (removing waterproof canvas ceiling and surround canvases), replacement and recovery of the topsoil  
130 layer and lost cornstalk, smashing of soil clods, restoring broken ridges, and smoothing of irregularities  
131 on the surface (Polyakov and Nearing, 2003).

## 132 **Experimental measurements**

### 133 **Runoff process**

134 Runoff-yielding time was measured using a stopwatch. Runoff velocity was measured thrice in 1  
135 m distance for each rainfall intensity in three soil sections (2, 5, and 7 m from the top of slope) after  
136 the runoff became steady, using the KMnO<sub>4</sub> dye tracer method (Zhang et al., 2009b).

### 137 **Runoff and soil loss**

138 Runoff and sediment samples were collected in 15-L buckets every 5 min once runoff occurred  
139 during each rainfall event. After allowing sediment settling for 1 h, the volume of supernatant was  
140 measured to calculate runoff loss. The sediment samples were oven-dried at 45 °C and weighed to  
141 calculate sediment yield.

#### 142 **Soil splash-erosion**

143 Standard Morgan field splash cups (Morgan, 1978) were used to measure soil splash transport  
144 extent. Soil splash detachment was measured using specially designed aluminum cylindrical splash  
145 cups with 3-cm depth, 6-cm diameter, and a multihole bottom. The undisturbed soil was cut and packed  
146 into the cups and weighed immediately after drying at 45 °C. The soil cups were allowed to absorb  
147 moisture at 20-25 °C for 24 h. Three Morgan cups were arranged into each plot on the top-, mid-, and  
148 lower-slopes (at distances of 2, 5, and 7 m from the top), together with the small cups, as in Figure 3  
149 (b, c). **The measure of splash erosion started at rainfall begin for 15 min to allow splash-erosion to**  
150 **occur.** The soil was again weighed immediately after drying, and the splash transport and detachment  
151 amounts measured.

#### 152 **Measurement of raindrop energy and drop-size distribution**

153 **The measurement of rainfall energy and rain drop-size distribution was using splash pan and**  
154 **followed the method as reported by Qin et al. (2014).**

155 **The energy calculation equation is showed in formula (1):**

$$156 \quad E = \rho\pi d^3 V_m^2 / 12 \quad (1)$$

157 **Where, E is the rainfall energy, J;  $\rho$  is rainfall density, which was measure at each simulation**  
158 **rainfall, kg/m<sup>3</sup>;  $\pi$  is a constant, 3.14;  $d$  is the raindrop size, which was measured using splash-pan**  
159 **at each simulation rainfall, m;  $V_m$  is the raindrop velocity, m/s.**

#### 160 **Data analysis**

161 All data were analyzed for statistical significance of treatment effects by one-way analysis of  
162 variance (ANOVA) using SPSS 16.0 (SPSS Inc., Chicago, IL, USA). The least significant difference

163 (LSD) at  $p < 0.05$  was used to compare the treatment means. Plots were drawn using Origin 9.0 (Origin  
164 Lab Corporation, Northampton, MA, USA).

## 165 **Results**

### 166 **Raindrop energy and distribution above/below corn seedling canopy**

167 As shown in Tables 1 and 2, the energy and size distribution of raindrops were significantly  
168 different between above and below the canopy of seedling corn. Under the two rainfall intensities, the  
169 canopy mitigation of raindrop energy was observed more in conservation than conventional tillage  
170 measures. Compared to above canopy, the percentage of raindrops of below canopy with less than 2.5  
171 mm diameter decreased while the raindrops larger than 2.5 mm diameter increased at the rainfall  
172 intensity of  $50 \text{ mm h}^{-1}$ ; meanwhile, the percentage of raindrops of below canopy with less than 2.0 mm  
173 diameter decreased while that of raindrops larger than 2.0 mm diameter increased at the rainfall  
174 intensity of  $100 \text{ mm/h}$ .

### 175 **Runoff-yielding time and runoff velocity**

176 Table 3 shows that conservation tillage measures could significantly delay the runoff-yielding time  
177 and decrease surface flow velocity, compared to CK and Vr, at the maize seedling stage. Compared  
178 with CK and Vr, the runoff-yielding times of the Cm, Hr, Hr+Cm, and Vr+Cm treatments were  
179 significantly postponed; the runoff-yielding time advanced at  $100 \text{ mm h}^{-1}$  than at  $50\text{-mm h}^{-1}$ . The  
180 Hr+Cm treatment successfully prevented runoff yielding throughout the rainfall event under  $50 \text{ mm h}^{-1}$ ,  
181 and the average prolonged runoff-yielding time was approximately 26.1 min, which was 23.8 times  
182 greater than that of the CK treatment under  $100 \text{ mm h}^{-1}$ . The average delay time durations for other  
183 treatments were 23.6 min for Hr, 5.6 min for Cm, and 2.8 min for Vr+Cm.

184 Table 3 also shows that the declining effects on surface flow velocity were more obvious under  
185 light than under heavy rainfall intensity. Compared to the CK, the Hr+Cm, Cm, Vr+Cm, and Hr  
186 treatments reduced the surface flow velocity significantly, with a decline of 100% (no runoff

187 generation), 75.8%, 71.9%, and 83.5%, respectively, at a rainfall intensity of 50 mm h<sup>-1</sup>, and 96.4%,  
188 82.9%, 77.7%, and 71.5%, respectively, at the rainfall intensity of 100 mm h<sup>-1</sup>. However, Vr  
189 significantly increased the runoff velocity by 50.3% and 10.1% at the rainfall intensities of 50 and 100  
190 mm h<sup>-1</sup>, respectively.

## 191 **Total runoff and soil loss**

### 192 **Surface runoff**

193 **Compared to CK, the conservation tillage measures of Cm, Hr, and Hr+Cm significantly reduced**  
194 **the runoff amount under the two rainfall intensities at the maize seedling stage (Figure 4);** the Cm and  
195 Hr treatments reduced the runoff amount by 70.5% and 87.8%, respectively, at 50 mm h<sup>-1</sup> and by 44.8%  
196 and 58.9%, respectively, at 100 mm h<sup>-1</sup>, respectively. The Hr+Cm treatment entirely prevented runoff  
197 generation at 50 mm h<sup>-1</sup> and was still effective at 100 mm h<sup>-1</sup>, restricting the total runoff amount to a  
198 very low level of 20.79 L, accounting for only 16.6% of CK, and even causing ridge rupture. The  
199 Vr+Cm treatment significantly decreased the runoff amount by 54.6% compared to CK at 50 mm h<sup>-1</sup>,  
200 but there was no difference at 100 mm h<sup>-1</sup>. Conversely, Vr significantly enhanced the runoff amount  
201 by 25.0% compared to CK at 50 mm h<sup>-1</sup>, but there was no difference at 100 mm h<sup>-1</sup>.

### 202 **Soil loss**

203 The total soil loss in Cm, Hr, Vr+Cm, and Hr+Cm was significantly lower than CK at the maize  
204 seedling stage (Figure 5). Vr significantly augmented the soil loss amount by 7.03- and 2.29-fold at  
205 the rainfall intensities of 50 and 100 mm h<sup>-1</sup>, respectively. However, the total soil loss of CK was  
206 greater than that of Cm, Hr, and Vr+Cm, exceeding by 11.9-, 6.0-, and 7.8-fold at 50 mm h<sup>-1</sup> and by  
207 11.1-, 4.4-, 16.2-, and 20.5-fold at 100 mm h<sup>-1</sup>, respectively. Like the effect on runoff amount, Hr+Cm  
208 also showed the best performance for preventing runoff and soil loss at 50 mm h<sup>-1</sup> (Table 3 and Figure  
209 4). The total soil loss was not different among the other three conservation measures of Cm, Hr, and  
210 Vr+Cm at 50 mm h<sup>-1</sup>, although the ridges of Hr were breached; meanwhile, Cm, Vr, and Hr+Cm  
211 showed no significant difference, but Hr showed a significantly different soil loss from the three

212 treatments because of ridge rupturing at 100 mm h<sup>-1</sup>. The results indicated that the conservation  
213 measures were useful in reducing soil loss; in particular, mulching was more effective than contour  
214 ridging, as seen in the case where the soil loss caused by Hr increased more than that caused by other  
215 conservation measures, especially under high rainfall intensity conditions, when contour ridges were  
216 destroyed.

### 217 **Horizontal ridge rupture**

218 As shown in Figures 6 and 7, mulching could not totally prevent contour ridge rupture, especially  
219 under heavy rainfall conditions; for example, the ridge of Hr was destroyed at both rainfall intensities,  
220 while that of Hr+Cm occurred only at 100 mm h<sup>-1</sup>. The ridge rupture occurred earlier at 100 mm h<sup>-1</sup>  
221 than at 50 mm h<sup>-1</sup>. The averaged runoff rate of Hr was 3.8-fold greater after ridge rupture than before  
222 at 50 mm h<sup>-1</sup>, being 22.6- and 1.6-fold greater under Hr and Hr+Cm at 100 mm h<sup>-1</sup>, respectively.  
223 Meanwhile, the average soil loss rate of Hr was 13.8-fold greater after ridge rupture than before at 50  
224 mm h<sup>-1</sup>, being 94.7- and 1.1-fold greater under Hr and Hr+Cm at 100 mm h<sup>-1</sup>, respectively.

### 225 **Erosion process**

#### 226 **Surface runoff process**

227 The runoff trends in most treatments were similar at both 50 and 100 mm h<sup>-1</sup> (Figure 6), including  
228 two stages: 1) a low starting rate followed by a dramatic increase during the initial runoff-yielding  
229 period, and 2) a relatively stable rate that persisted until the end of rainfall experiment. However, the  
230 regular trends could be interfered with by a ridge rupture in the Hr and Hr+Cm treatments, with runoff  
231 rates suddenly rising in the Hr-treated plot at 40 and 25 min under the rainfall intensities of 50 and 100  
232 mm h<sup>-1</sup>, respectively, and in the Hr+Cm treatment at 60 min under 100 mm h<sup>-1</sup> rainfall. In comparison,  
233 the average runoff rate of CK was greater than that of Cm, Vr, Hr, and Vr+Cm by 2.9-, 0.8-, 5.0-, and  
234 1.9-fold at 50 mm h<sup>-1</sup>, respectively, and by 1.8-, 1.0-, 1.7-, and 1.2-fold, respectively, at 100 mm h<sup>-1</sup>.  
235 In addition, the average runoff rate of CK was 3.7-fold greater than that of Hr+Cm at 100 mm h<sup>-1</sup>.



236 Compared to CK, the Cm, Hr, and Hr+Cm treatments reduced the runoff loss rates significantly  
237 on all points within the entire rainfall experiment (Figure 6). At 50 mm h<sup>-1</sup>, Hr showed a better capacity  
238 for controlling runoff loss rates than Cm. Vr had no notable effects on runoff loss rates at most of the  
239 points at 100 mm h<sup>-1</sup> but could promote the loss rate significantly at 50 mm h<sup>-1</sup>, including the whole  
240 process except for the runoff-yielding point. The runoff loss rates of Vr+Cm were significantly lower  
241 than those of CK at 50 mm h<sup>-1</sup>, with an average runoff rate of 53.6%, while the reduction was very  
242 limited at 100 mm h<sup>-1</sup>.

243 Figure 6 also illustrates that the stable runoff rates were lower at 50 mm h<sup>-1</sup> than at 100 mm h<sup>-1</sup> in  
244 all treatments. The runoff rates of CK, Cm, Vr, Hr, Vr+Cm, and Hr+Cm stabilized at approximately  
245 91.8, 30.1, 118.7, 20.3, 48.2, and 0 mL s<sup>-1</sup> at 50 mm h<sup>-1</sup>, respectively, and at 198.6, 117.4, 192.5, 122.9,  
246 176.1, and 49.9 mL s<sup>-1</sup> at 100 mm h<sup>-1</sup>, respectively.

247 The results suggested that the mulching treatments, including Cm, Hr+Cm, and Vr+Cm, could  
248 mitigate rate-changing magnitudes compared to the corresponding tillage measures without mulching,  
249 that is CK, Hr, and Vr, indicating that more rainfall was infiltrated or stored under the treatments with  
250 mulching compared to those without mulching.

### 251 **Sediment yielding process**

252 As shown in Figure 7, the sediment loss rates in most treatments varied based on the changing  
253 trends of the runoff loss rate (Figure 6), with a relatively low starting level and then varied within a  
254 certain range based on rainfall intensity. The four conservation practices could effectively reduce soil  
255 loss rate compared to the conventional tillage of CK and Vr, except that the ridges ruptured, and the  
256 Vr treatment obviously enhanced the soil loss rate compared to CK. In comparison, the average soil  
257 loss rates of CK were 10.0-, 3.7-, and 6.6-fold greater than those of Cm, Hr, and Vr+Cm at 50 mm h<sup>-1</sup>  
258 <sup>1</sup>, respectively, and 13.0-, 3.0-, 16.2-, and 12.6-fold greater than those of Cm, Hr, Vr+Cm, and Hr+Cm  
259 at 100 mm h<sup>-1</sup>, respectively. However, the averaged soil loss rates of Vr were 7.0- and 2.3-fold greater  
260 than those of CK at 50- and 100-mm h<sup>-1</sup>, respectively.

261 The impact of ridge rupture was greater at 100 mm h<sup>-1</sup> than at 50 mm h<sup>-1</sup>, and the subsequent soil  
262 loss rates would stay higher thereafter, rather than being at the former level at 100 mm h<sup>-1</sup>, which  
263 dropped to former rates under 50 mm h<sup>-1</sup> (Figure 5). Hr could reduce the sediment loss rate throughout  
264 the entire rainfall process, averaging 82.0% and 68.40% of CK under the two rainfall intensities, but  
265 two of the three ridge rupture time points made the instantaneous rates higher than the earlier rates.

266 During rainfall events, the mean soil loss rates in the three mulching treatments of Cm, Vr+Cm,  
267 and Hr+Cm were approximately 0.01, 0.02, and 0 g s<sup>-1</sup> at 50 mm h<sup>-1</sup>, and 0.09, 0.07, and 0.09 g s<sup>-1</sup> at  
268 100 mm h<sup>-1</sup>, respectively, being significantly lower than those of CK, which were approximately 0.15  
269 and 1.18 g s<sup>-1</sup> at 50 and 100 mm h<sup>-1</sup>, respectively. The soil loss rates of these mulching treatments were  
270 also lower than those of the non-mulching treatments, such as Vr and Hr, which were approximately  
271 1.02 and 0.04 g s<sup>-1</sup> at 50 mm h<sup>-1</sup> and 2.70 and 0.39 g s<sup>-1</sup> at 100 mm h<sup>-1</sup>, respectively (Figure 7). Mulching  
272 also mitigated the changing trends of sediment loss rate, i.e., restricting the rate variation magnitude  
273 to a lower scale. Therefore, the mulching treatments were more effective in controlling the sediment  
274 yield compared to no mulch treatments.

## 275 **Factors influencing soil loss**

276 The relationship between sediment yield and splash-detachment, splash-transport, total runoff, and  
277 surface flow rate was analyzed, and are illustrated in Figure 8 and Table 4. The mulching treatments  
278 could restrict splash-erosion to very low levels, reducing the average splash-detachment and splash-  
279 transport amounts from 143.16 to 1.13 g m<sup>-2</sup> h<sup>-1</sup> and from 1063.90 to 8.93 g m<sup>-2</sup> h<sup>-1</sup>, respectively. The  
280 ridge treatments had no significant impacts on splash-erosion. Thus, for uncovered plots, splash  
281 erosion was mainly influenced by rainfall intensity. The linear correlation coefficients (R<sup>2</sup>) of the  
282 splash-detachment and splash-transport rates to rainfall intensity were 0.93 and 0.98, respectively. The  
283 splash rates of Cm were also partly related to the rainfall intensity, but the correlation was more  
284 complicated, and thus further study is needed.

285 In general, the total soil loss increased with an increase in splash-erosion rate, escalating in non-  
286 mulching treatments under light rainfall conditions. However, when the plots suffered ridge rupture,  
287 the impact of splash-erosion on soil loss appeared to be insignificant. With an increase in runoff  
288 volume and velocity, soil loss would also ascend, and thus treatments with high runoff volume and  
289 velocity would also lead to serious soil loss. However, this regulation was not applicable to mulching  
290 treatments.

## 291 **Discussion**

### 292 **Effects of tillage measures on runoff**

293 We verified that crops could act as a type of vegetation cover (Table 1 and 2) and play an important  
294 role in mitigating runoff and soil loss on sloping farmlands, in agreement with previous studies (Cerdà  
295 et al., 2017; Prosdocimi et al., 2016a, b; Wang et al., 2018). Different tillage systems have different  
296 impacts on soil erosion associated with processes occurring in slope farmlands (Liu et al., 2011; Xu et  
297 al., 2018). The Vr treatment has already been verified to increase soil erosion because of  
298 microtopography changes (Liu et al., 2011; Zhang et al., 2009a).

299 In the present study, conservation tillage could significantly postpone runoff **initiation** and  
300 decrease runoff velocity compared to conventional tillage. Our results indicated that horizontal ridges,  
301 mulching, or seedling corn canopy were effective in controlling runoff generation, especially at 50  
302 mm/h, at the maize seedling stage. The conservation measures could have enhanced the infiltration  
303 capacity of water or increased soil surface roughness (Rodríguez-Caballero et al., 2012; Vermang et  
304 al., 2015; Wang et al., 2018), and crop leaves could intercept rainfall and alter raindrop diameter and  
305 energy (Ma et al., 2013; Zhang et al., 2015). As there are only limited chances for extreme precipitation  
306 in the region (Zhang et al., 2010), adopting Hr and Cm would limit runoff generation. In addition, the  
307 two tillage measures also reduced the runoff-flow velocity, which is a key factor influencing runoff  
308 energy and erosiveness (Vermang et al., 2015); both Hr and Cm performed better at 50 mm h<sup>-1</sup> than at  
309 100 mm h<sup>-1</sup>. Our results are consistent with previous studies on other soil types (Prosdocimi et al.,

310 2016a, b; Xu et al., 2017). The runoff generation was postponed and the surface-flow velocity  
311 decreased mainly because both Hr and Cm treatments changed the microtopography of the soil with  
312 increasing surface roughness (Vermang et al., 2015; Wang et al., 2018) and the infiltration of  
313 conservation tillage was higher than that of conventional measures. The outcome offered more water  
314 storage microstructure for the surficial soil, causing the rainwater to infiltrate rather than flowing  
315 downhill (Liu et al., 2015; USDA-ARS, 2008, 2013). The outcome also increased the friction between  
316 rainwater and land, thereby reducing runoff velocity. Comparing the effects of Hr and Cm, Hr set a  
317 higher threshold for runoff yield, as it could lead to more water storage between ridges. However, once  
318 the runoff had occurred, Cm performed better, since the presence of cornstalk could reduce the flow  
319 velocity to a very low level. Thus, Hr+Cm is the optimal treatment from the perspective of postponing  
320 runoff-yield and restricting the destruction of runoff, once generated.

321 The runoff loss rate significantly increased following a low start during the runoff generation  
322 period and then remained stable at a certain level, based on the rainfall intensity. The results correspond  
323 with the findings of a study in purple soil (Xu et al., 2008). Hr and Cm could effectively constrain the  
324 runoff loss rates and decrease the runoff amount, especially at  $50 \text{ mm h}^{-1}$ . The Hr+Cm treatment, which  
325 combined horizontal ridging and mulching, influenced runoff under all rainfall types, especially under  
326 a rainfall intensity of  $50 \text{ mm h}^{-1}$ . As runoff is the main vector affecting both soil loss and agricultural  
327 non-point source pollution (Hudson, 2015; Zhang et al., 2007), Hr+Cm should be recommended as an  
328 effective tillage practice in the region.

329 However, this recommendation would engender extremely higher outliers for runoff rate as a real-  
330 time response to ridge rupture when the plots were treated with Hr, especially under heavy rainfall  
331 conditions (Li et al., 2016; Lu et al., 2016). In this case, the water held by the two adjacent ridges  
332 drained immediately after ridge rupture and rushed out into the next inter-ridge area, causing either  
333 successive ridge ruptures or runoff overflow, both of which could prompt a sudden upsurge in runoff  
334 rate (Xu et al., 2018). Consequently, the total runoff loss amount also increased. The rising magnitude

335 caused by ridge rupture depended on the rupture time and location of the initially ruptured ridge. In  
336 the present study, in the Hr-treated plot, ridge rupture occurred relatively earlier and closer to the top  
337 of the plot under a rainfall intensity of 100 mm h<sup>-1</sup> than under 50 mm h<sup>-1</sup> resulting in greater runoff  
338 loss. Thus, enhancing the quality of ridges to improve their water pressure tolerance capability is vital  
339 when applying horizontal ridges (Liu et al., 2014a).

340 Mulching could directly lead to water absorption and protection of a ridge from saturation and  
341 erosion by raindrops and runoff (Cerdà et al., 2016; Jordán et al., 2010), thereby reducing the risk of  
342 ridge rupture. In the present study, Hr-treated plots suffered three times as many ridge ruptures, while  
343 the Hr+Cm plots suffered only one ridge rupture. Moreover, no successive ridge ruptures were  
344 observed in the Hr+Cm plots, because mulching and soil blocks would likely be obstructed by the next  
345 ridge with the presence of cornstalk, rather than triggering successive ridge ruptures, even if one of the  
346 ridges happened to rupture. Moreover, ridge-furrow planting under mulching conditions played an  
347 effective role in reducing surface runoff with an increase in soil-water infiltration (Gholami et al.,  
348 2013; Kader et al., 2017).

349 Vr could increase the runoff loss rate and amount under light rainfall conditions, as shown by Shen  
350 et al. (2005) and Zhang et al. (2009a) on black soil, and by Xu et al. (2008) on purple soil farmlands  
351 compared to the runoff between contours and downslope ridges. Therefore, vertical ridges should be  
352 avoided on slope croplands in the region.

### 353 **Effects of tillage measures on soil loss**

354 Both Hr and Cm could alleviate soil erosion, mainly by improving the microtopography to increase  
355 soil surface roughness (Rodríguez-Caballero et al., 2012; Vermang et al., 2015), and improve soil  
356 physicochemical properties. Moreover, Vr should be circumvented as it augments both soil loss rate  
357 and amount (Kader et al., 2017; Mulumba and Lal, 2008).

358 When there was no ridge rupture during the rainfall, Hr effectively reduced sediment yield and  
359 soil loss rate, as shown in previous studies (García-Orenes et al., 2012). However, after ridge rupture,

360 the impacts on sediment loss were much more severe than on runoff, e.g., the runoff rate was amplified  
361 22.6 times compared to its neighboring point, while the sediment loss rate was amplified 94.7 times  
362 after ridge rupture occurred in Hr under a rainfall intensity of 100 mm h<sup>-1</sup>. This outcome may have  
363 occurred because the broken ridges, which were normally big soil blocks, were prone to being directly  
364 swept and, thus, lost via runoff (Xu et al., 2018). The residual ridge remaining to be washed  
365 continuously by runoff would also increase the sediment concentration in runoff after the ridge rupture,  
366 leading to a higher soil loss rate. Soil loss would be further amplified if ridge rupture occurred in the  
367 top section of the plot and thus likely triggered successive ruptures.

368 Our study revealed that Cm was more reliable than Hr in controlling soil loss (Kader et al., 2017;  
369 Prosdocimi et al., 2016b), as it could restrict both the sediment yield and soil loss rate to very low  
370 levels (García-Orenes et al., 2012). The reason might be that the flow could accumulate sufficient  
371 power to detach and transport particles with mulching (Mannering and Meyer, 1963; Poesen and  
372 Lavee, 1991). In addition, Cm could postpone the soil loss rate that increasingly responded to rainfall  
373 intensity enhancement, which is an important effect on soil erosion because rainfall has a short duration  
374 but high intensity during the maize seeding stage in Northeastern China (Sun et al., 2000; Zhang et al.,  
375 2010). This postponing effect would counteract or even eliminate the instantaneous serious destruction  
376 due to torrential rain. Hence, Hr+Cm significantly prevented soil loss, especially under light rainfall  
377 intensity conditions, and thus, in practice, should be suggested to reduce soil erosion.

### 378 **Influencing factors**

379 Soil erosion is related to both runoff strength and soil erodibility (Tang, 2004; Wang et al., 2012;  
380 Wang, 1993). Runoff serves as a vector for sediment (Hudson, 2015), and the final sediment yield is  
381 based on both runoff strength and soil erodibility (Wang, 1993). Runoff strength can be illustrated by  
382 volume and velocity, representing its amount and energy, respectively (Prosdocimi et al., 2016a).  
383 Generally, in our study, the treatments with higher runoff strength experienced worse soil erosion.  
384 However, grievous splash-erosion, i.e., worse erodibility, did not always correspond to high soil loss.

385 Therefore, runoff strength should be a direct predictor of soil erosion.

386 According to our results, higher-strength runoff and more soil loss was observed with heavier  
387 rainfall, which indicated that the hydrological response of the soil is based on Hortonian flow type  
388 (Bombino et al., 2021).

389 At the seedling stage, maize plants could protect the surface soil from splash-erosion by preventing  
390 direct raindrop action, reducing their kinetic energy, and by changing the distribution of raindrops  
391 because of canopy gaps (Ghahramani et al., 2011; Miyata et al., 2009). Nevertheless, as discussed  
392 earlier, splash-erosion has a limited influence on total soil loss amount. Therefore, the excellent effects  
393 of mulching on erosion control shown in this experiment should mainly result in two other functions,  
394 reducing runoff strength and filtering out runoff soil particles (Prosdocimi et al., 2016a, b). Both  
395 functions caused a reduction in sediment concentration because of the effects of mulching as buffer  
396 strips (Fang, 2017).

### 397 **Horizontal ridge rupture**

398 Horizontal ridge rupture or breaching is a common concern in Northeast China, as erosive storms  
399 can occur in summer with short duration but high intensity (Shen et al., 2005); such storms often  
400 coincide with snowmelt runoff in spring (Li et al., 2016; Lu et al., 2016; Xu et al., 2018). Contour  
401 ridge stability is mainly related to ridge geometry, sloping land microtopography, soil physical  
402 properties of the ridge body, and rainfall characteristics (Liu et al., 2014a; Shen et al., 2005). In  
403 addition, the sediment concentration stayed higher thereafter rather than being at the former level at 100  
404  $\text{mm h}^{-1}$ , while dropping to former rates under  $50 \text{ mm h}^{-1}$  (Fig. 7), which might be due to the significant  
405 differences in runoff, sediment, and infiltration amount under the two rainfall intensities (Liu et al.,  
406 2014a; Liu et al., 2019; Shen et al., 2005).

407 Generally, Hr can increase water infiltration before breaching (Liu et al., 2015; USDA-ARS, 2008,  
408 2013) and lead to abundant sediment storage (Xu et al., 2018). Time of ridge rupture shortens with  
409 higher rainfall intensity (Liu et al., 2015; Liu et al., 2014a; Liu et al., 2014b; Xu et al., 2018). Extremely

410 high runoff and soil loss rates after rupture are analogous to the relationships among the peaks of runoff  
411 and sediment yield and ridge failure (Liu et al., 2015; Liu et al., 2014b; Xu et al., 2018). Averaged  
412 peak runoff and soil loss rates after ridge failure were 9.3- and 36.7-fold those prior neighboring points,  
413 respectively. The ratio of peak sediment rate to base sediment rate under Hr in this study ranged from  
414 13.8 to 94.7 g L<sup>-1</sup>. The varied range differed but included previous results reported by Liu et al. (2014b)  
415 and Xu et al. (2018). Our study showed that contour ridges rupturing at 50 mm h<sup>-1</sup> were not in  
416 agreement with the results of Xu et al. (2018), possibly because of the differences in ridge geometry  
417 characteristics, such as ridge height. Liu et al. (2014b) suggested that increasing ridge height might  
418 prevent horizontal ridge failure and decrease soil loss hazard risk, considering enhanced water storage  
419 capacity.

420 Our study illustrated that mulching could not always avert ridge rupture but could significantly  
421 postpone the collapse time of ridge failure (Figure 6 and 7), possibly because mulching improves soil  
422 properties (Kader et al., 2017; Kurothe et al., 2014; Prosdocimi et al., 2016a, b) and, therefore, alters  
423 runoff and soil erosion characteristics (Gholami et al., 2013).

## 424 **Conclusions**

425 Rainfall simulation experiments were conducted to study the effects of six measures of two tillage  
426 systems on water-based soil erosion of a black soil hillslope during the maize seedling stage under two  
427 rainfall intensities (50 and 100 mm h<sup>-1</sup>) in Northeast China. The results showed that corn seedlings  
428 could protect the surface soil from splash-erosion by reducing the kinetic energy and changing the  
429 distribution of raindrops. Conservation measures with mulching significantly reduced water and soil  
430 loss compared to conventional tillage. Mulching had an ideal erosion-controlling capacity. In addition,  
431 mulching could mitigate soil loss increase caused by heavy rainfall. The positive effects of mulching  
432 were based on its strong ability to reduce splash-erosion and runoff volume and, more importantly, on  
433 its function to decrease runoff velocity and filter runoff sediment in. Vr further exacerbates soil erosion  
434 and should normally be avoided. The horizontal ridging plus mulching treatment had the optimal



435 performance and should be adopted as an optimized tillage measure in black soil hillslope to restrict  
436 soil erosion in corn seedling stage.

437

#### 438 **Funding**

439 This work was supported by the National Natural Science Foundation of China (No. 32272819), and  
440 the Jilin Scientific and Technological Development Program (No. 202203022003NC, No.  
441 202303022003NC, and No. 20210202011NC). Special thanks are owed to the anonymous reviewers  
442 and editors.

#### 443 **Code/Data availability**

444 The original contributions presented in the study are included in the article/Supplementary Material;  
445 further inquiries can be directed to the corresponding author.

#### 446 **Author contribution**

447 NC and YBZ designed the research and supervised the project. YCW, ZL, LSW, BL, and LYH were  
448 key players for the field trials and collected data. YCW, ZL, and YZ analyzed the data and verified the  
449 analytical methods. DYG, YBZ, NC, and JHC wrote the manuscript.

#### 450 **Competing interests**

451 The authors declare that the research was conducted in the absence of any commercial or financial  
452 relationships that could be construed as a potential conflict of interest.

453

#### 454 **References**

- 455 Blanco-Moure, N., Moret-Fernandez, D., and Lopez, M. V.: Dynamics of aggregate destabilization by  
456 water in soils under long-term conservation tillage in semiarid Spain. *Catena*, 99, 34–41.  
457 <https://doi.org/10.1016/j.catena.2012.07.010>, 2012.
- 458 Bombino, G., Denisi, P., Gomez, J. A., and Zema, D. A.: Mulching as best management practice to  
459 reduce surface runoff and erosion in steep clayey olive groves. *International Soil and Water*  
460 *Conservation Research*, 9(1), 26–36. <https://doi.org/10.1016/j.iswcr.2020.10.002>, 2021.
- 461 Busari, M. A., Kukal, S. S., Kaur, A., Bhatt, R., and Dulazi, A. A.: Conservation tillage impacts on  
462 soil, crop and the environment. *International Soil and Water Conservation Research*, 3(2), 119–  
463 129. <https://doi.org/10.1016/j.iswcr.2015.05.002>, 2015.
- 464 Cerdà, A., González-Pelayo, Ó., Giménez-Morera, A., Jordán, A., Pereira, P., Novara, A., Brevik, E.

- 465 C., Prosdocimi, M., Mahmoodabadi, M., Keesstra, S., Orenes, F. G., and Ritsema, C. J.: Use  
466 of barley straw residues to avoid high erosion and runoff rates on persimmon plantations in  
467 Eastern Spain under low frequency-high magnitude simulated rainfall events. *Soil Research*,  
468 54(2), 154–165. <https://doi.org/https://doi.org/10.1071/SR15092>, 2016.
- 469 Cerdà, A., Rodrigo-Comino, J., Gimenez-Morera, A., and Keesstra, S. D.: An economic, perception  
470 and biophysical approach to the use of oat straw as mulch in Mediterranean rainfed agriculture  
471 land. *Ecological Engineering*, 108, 162–171. <https://doi.org/10.1016/j.ecoleng.2017.08.028>,  
472 2017.
- 473 Chesworth, W. (Eds.): *Encyclopedia of Soil Science*. Springer, Dordrecht. <https://doi.org/10.1007/978-1-4020-3995-9>, 2008.
- 474  
475 CRGCST (Cooperative Research Group on Chinese Soil Taxonomy): *Chinese Soil Taxonomy*.  
476 Beijing, New York: Science Press, China, 2001.
- 477 DeLonge, M., and Stillerman, K. P.: *Eroding the Future: How Soil Loss Threatens Farming and Our*  
478 *Food Supply*. Union of Concerned Scientists. Online, 16 December 2020,  
479 <https://www.ucsusa.org/resources/eroding-future>, 2020.
- 480 Fang, H. Y.: Impact of land use change and dam construction on soil erosion and sediment yield in the  
481 black soil region, Northeastern China. *Land Degradation & Development*, 28(4), 1482–1492.  
482 <https://doi.org/10.1002/ldr.2677>, 2017.
- 483 FAO.: Soil erosion: the greatest challenge to sustainable soil management. Rome. 100 pp. Licence: CC  
484 BY-NC-SA 3.0 IGO, 2019.
- 485 García-Orenes, F., Roldán, A., Mataix-Solera, J., Cerdà, A., Campoy, M., Arcenegui, V., and Caravaca,  
486 F.: Soil structural stability and erosion rates influenced by agricultural management practices  
487 in a semi-arid Mediterranean agro-ecosystem. *Soil Use and Management*, 28(4), 571–579.  
488 <https://doi.org/10.1111/j.1475-2743.2012.00451.x>, 2012.
- 489 Ge, Y., Guo, X., Zhan, M., Yan, H., Liao, Y., and Yu, B.: Erosion rate of lateral slope deposit under the  
490 effects of different influencing factors. *Frontiers in Earth Science*, 9, 670087.  
491 <https://doi.org/10.3389/feart.2021.67008>, 2021.
- 492 Ghahramani, A., Ishikawa, Y., Gomi, T., Shiraki, K., and Miyata, S.: Effect of ground cover on splash  
493 and sheetwash erosion over a steep forested hillslope: A plot-scale study. *Catena*, 85(1), 34–  
494 47. <https://doi.org/10.1016/j.catena.2010.11.005>, 2011.
- 495 Gholami, L., Sadeghi, S. H., and Homae, M.: Straw mulching effect on splash erosion, runoff, and  
496 sediment yield from eroded plots. *Soil Science Society of America Journal*, 77(1), 268–278.  
497 <https://doi.org/10.2136/sssaj2012.0271>, 2013.
- 498 Goddard, T., Zebisch, M. A., Gan, Y. T., Ellis, W., Watson, A., and Sombatpanit, S. (Eds): *No-Till*  
499 *Farming Systems*. Special Publication No. 3, World Association of Soil and Water Conservation  
500 (WASWC), Bangkok, 2008.
- 501 Haddadchi, A., Hicks, D. M., Olley, J. M., Singh, S., and Srinivasan, M. S.: Grid-based sediment  
502 tracing approach to determine sediment sources. *Land Degradation Development*, 30, 2088–  
503 2106. <https://doi.org/10.1002/ldr.3407>, 2019.
- 504 Hansen, N. C., Allen, B. L., Baumhardt, R. L., and Lyon, D. J.: Research achievements and adoption  
505 of no-till, dryland cropping in the semi-arid U.S. Great Plains. *Field Crops Research*, 132, 196–  
506 203. <https://doi.org/https://doi.org/10.1016/j.fcr.2012.02.021>, 2012.
- 507 Huang, J., Wang, J., Zhao, X. N., Wu, P. T., Qi, Z. M., and Li, H. B.: Effects of permanent ground  
508 cover on soil moisture in jujube orchards under sloping ground: A simulation study.  
509 *Agricultural Water Management*, 138, 68–77. <https://doi.org/10.1016/j.agwat.2014.03.002>,  
510 2014.
- 511 Hudson, N. (Eds.): Soil conservation: Fully revised and updated. New India Publishing Agency, India,  
512 2015.
- 513 IUSS Working Group WRB.: World Reference Base for Soil Resources 2014, update 2015  
514 International soil classification system for naming soils and creating legends for soil maps.

World Soil Resources Reports No. 106. FAO, Rome, 2015.

Jordán, A., Zavala, L. M., and Gil, J.: Effects of mulching on soil physical properties and runoff under semi-arid conditions in southern Spain. *Catena*, 81(1), 77–85. <https://doi.org/10.1016/j.catena.2010.01.007>, 2010.

Jia, L. Z., Zhao, W. W., Zhai, R. J., Liu, Y., Kang, M. M., and Zhang, X.: Regional differences in the soil and water conservation efficiency of conservation tillage in China. *Catena*, 175, 18–26. <https://doi.org/10.1016/j.catena.2018.12.012>, 2021.

Kader, M. A., Senge, M., Mojid, M. A., and Ito, K.: Recent advances in mulching materials and methods for modifying soil environment. *Soil & Tillage Research*, 168, 155–166. <https://doi.org/10.1016/j.still.2017.01.001>, 2017.

Kurothe, R. S., Kumar, G., Singh, R., Singh, H. B., Tiwari, S. P., Vishwakarma, A. K., Sena, D. R., and Pande, V. C.: Effect of tillage and cropping systems on runoff, soil loss and crop yields under semiarid rainfed agriculture in India. *Soil & Tillage Research*, 140, 126–134. <https://doi.org/10.1016/j.still.2014.03.005>, 2014.

Lal, R.: Sustainable intensification of China's agroecosystems by conservation agriculture. *International Soil and Water Conservation Research*, 6(1), 1–12. <https://doi.org/10.1016/j.iswcr.2017.11.001>, 2018.

Lampurlanés, J., and Cantero-Martínez, C.: Soil bulk density and penetration resistance under different tillage and crop management systems and their relationship with barley root growth. *Agronomy Journal*, 95(3), 526–536. <https://doi.org/10.2134/agronj2003.5260>, 2003.

Li, G. F., Zheng, F. L., Lu, J., Xu, X. M., Hu, W., and Han, Y.: Inflow rate impact on hillslope erosion processes and flow hydrodynamics. *Soil Science Society of America Journal*, 80(3), 711–719. <https://doi.org/10.2136/sssaj2016.02.0025>, 2016.

Liniger, H. P., Mekdaschi Studer, R., Moll, P., and Zander, U.: *Making sense of research for sustainable land management*. Centre for Development and Environment (CDE), University of Bern, Switzerland and Helmholtz-Centre for Environmental Research GmbH – UFZ, Leipzig, Germany, 2017.

Liu, G. S.: *Soil Physical and Chemical Analysis and Description of Soil Profiles*. Beijing: Chinese Standard Press, 1996.

Liu, H., Ren, C. Y., Xu, S. Z., Cui, F. T., and Pang, D. Q.: Inhomogeneous distribution of precipitation in Northeast China agricultural zone and its response to regional warming[J]. *Climate Change Research*, 14(4), 371–380. <https://doi.org/10.12006/j.issn.1673-1719.2018.003>, 2018.

Liu, H. H., Zhang, T. Y., Liu, B. Y., Liu, G., and Wilson, G. V.: Effects of gully erosion and gully filling on soil depth and crop production in the black soil region, northeast China. *Environmental Earth Sciences*, 68(6), 1723–1732. <https://doi.org/10.1007/s12665-012-1863-0>, 2018.

Liu, Q. J., An, J., Wang, L. Z., Wu, Y. Z., and Zhang, H. Y.: Influence of ridge height, row grade, and field slope on soil erosion in contour ridging systems under seepage conditions. *Soil & Tillage Research*, 147, 50–59. <https://doi.org/10.1016/j.still.2014.11.008>, 2015.

Liu, Q. J., Shi, Z. H., Yu, X. X., and Zhang, H. Y.: Influence of microtopography, ridge geometry and rainfall intensity on soil erosion induced by contouring failure. *Soil and Tillage Research*, 136, 1–8. <https://doi.org/10.1016/j.still.2013.09.006>, 2014a.

Liu, Q. J., Zhang, H. Y., An, J., and Wu, Y. Z.: Soil erosion processes on row sideslopes within contour ridging systems. *Catena*, 115, 11–18. <https://doi.org/https://doi.org/10.1016/j.catena.2013.11.013>, 2014b.

Liu, X. B., Zhang, S. L., Zhang, X. Y., Ding, G. W., and Cruse, R. M.: Soil erosion control practices in Northeast China: A mini-review. *Soil & Tillage Research*, 117, 44–48. <https://doi.org/10.1016/j.still.2011.08.005>, 2011.

Liu, Y. X., Xin, Y., Xie, Y., and Wang, W. T.: Effects of slope and rainfall intensity on runoff and soil erosion from furrow diking under simulated rainfall. *Catena*, 177, 92–100. <https://doi.org/10.1016/j.catena.2019.02.004>, 2019.

- 565 Liu, Z. M., Zhang, X. L., Lan, J. H., Li, G. Q., Liu, G. Y., Bai, W. B., Wang, Q. D., Abdumijiti, Z.,  
566 Wang, Y. J., and Yang, S. J.: Review and prospect of approved maize varieties in China from  
567 1979 to 2020. *Journal of Maize Sciences*, 29(2),1–7,15.  
568 <https://doi.org/10.13597/j.cnki.maize.science.20210201>, 2021.
- 569 Lu, J., Zheng, F. L., Li, G. F., Bian, F., and An, J.: The effects of raindrop impact and runoff detachment  
570 on hillslope soil erosion and soil aggregate loss in the Mollisol region of Northeast China. *Soil  
571 & Tillage Research*, 161, 79–85. <https://doi.org/10.1016/j.still.2016.04.002>, 2016.
- 572 Ma, B., Gale, W. J., Ma, F., Wu, F. Q., Li, Z. B., and Wang, J.: Transformation of rainfall by a soybean  
573 canopy. *Transactions of the Asabe*, 56(6), 1285–1293. <https://doi.org/10.13031/trans.56.9804>,  
574 2013.
- 575 Mannering, J. V., and Meyer, L. D.: The effects of various rates of surface mulch on infiltration and  
576 erosion. *Soil Science Society of America Journal*, 27(1), 84–86.  
577 <https://doi.org/10.2136/sssaj1963.03615995002700010029x>, 1963.
- 578 Miyata, S., Kosugi, K., Gomi, T., and Mizuyama, T.: Effects of forest floor coverage on overland flow  
579 and soil erosion on hillslopes in Japanese cypress plantation forests. *Water Resources Research*,  
580 42, W06402. <https://doi.org/10.1029/2008wr007270>, 2009.
- 581 Montgomery, D. R. (Eds.): *Growing a revolution: Bring our soil back to life*. W. W. Norton &  
582 Company, 2017.
- 583 Morgan, R. P. C.: Field studies of rainsplash erosion. *Earth Surface Processes*, 3(3), 295–299.  
584 <https://doi.org/https://doi.org/10.1002/esp.3290030308>, 1978.
- 585 Mulumba, L. N., and Lal, R.: Mulching effects on selected soil physical properties. *Soil & Tillage  
586 Research*, 98(1), 106–111. <https://doi.org/10.1016/j.still.2007.10.011>, 2008.
- 587 MWR.: *2019 Bulletin on China Soil and Water Conservation*. Beijing: Ministry of Water Resources,  
588 P. R. China, 2020.
- 589 MWR, CAS, and CAE.: *Soil erosion control and ecological security in China: Northeast Mollisos  
590 region*. Beijing: Science Press, 2010.
- 591 Pansu, M. and Gautheyrou, J. (Eds.): *Handbook of Soil Analysis: Mineralogical, Organic and  
592 Inorganic Methods*. Springer-Verlag Berlin Heidelberg, DOI:10.1007/978-3-540-31211-6,  
593 2006.
- 594 Poesen, J. W. A., and Lavee, H.: Effects of size and incorporation of synthetic mulch on runoff and  
595 sediment yield from interrills in a laboratory study with simulated rainfall. *Soil and Tillage  
596 Research*, 21(3), 209–223. [https://doi.org/https://doi.org/10.1016/0167-1987\(91\)90021-O](https://doi.org/https://doi.org/10.1016/0167-1987(91)90021-O),  
597 1991.
- 598 Polyakov, V. O., and Nearing, M. A.: Sediment transport in rill flow under deposition and detachment  
599 conditions. *Catena*, 51(1), 33–43. [https://doi.org/Pii S0341-8162\(02\)00090-5](https://doi.org/Pii S0341-8162(02)00090-5), 2003.
- 600 Prosdocimi, M., Jordan, A., Tarolli, P., Keesstra, S., Novara, A., and Cerda, A.: The immediate  
601 effectiveness of barley straw mulch in reducing soil erodibility and surface runoff generation  
602 in Mediterranean vineyards. *Science of the Total Environment*, 547, 323–330.  
603 <https://doi.org/10.1016/j.scitotenv.2015.12.076>, 2016a.
- 604 Prosdocimi, M., Tarolli, P., and Cerda, A.: Mulching practices for reducing soil water erosion: A  
605 review. *Earth-Science Reviews*, 161, 191–203. <https://doi.org/10.1016/j.earscirev.2016.08.006>,  
606 2016b.
- 607 **Qin, Y., Cheng, J. H., Zhang, H. J., Cong, Y., Yang, F., and Zhou, Z. D.: A study of the raindrop impact  
608 to splash erosion. *Chinese Journal of Soil and Water Conservation*, 28(2), 74-78.  
609 <https://doi.org/CNKI:SUN:TRQS.0.2014-02-014>, 2014.**
- 610 Rodríguez-Caballero, E., Cantón, Y., Chamizo, S., Afana, A., and Solé-Benet, A.: Effects of biological  
611 soil crusts on surface roughness and implications for runoff and erosion. *Geomorphology*, 145–  
612 146, 81–89. <https://doi.org/https://doi.org/10.1016/j.geomorph.2011.12.042>, 2012.
- 613 Sartori, M., Philippidis, G., Ferrari, E., Borrelli, P., Lugato, E., Montanarella, L., and Panagos, P.: A  
614 linkage between the biophysical and the economic: Assessing the global market impacts of soil

- 615 erosion. *Land Use Policy*, 86, 299–312.  
616 <https://doi.org/https://doi.org/10.1016/j.landusepol.2019.05.014>, 2019.
- 617 Shen, C. P., Gong, Z. P., and Wen, J. T.: Comparison study on soil and water loss of cross ridge and  
618 longitudinal ridge. *Bulletin of Soil and Water Conservation*, 25(4), 48–49.  
619 <https://doi.org/10.3969/j.issn.1000-288X.2005.04.012>, 2005.
- 620 Soil Survey Staff.: Soil taxonomy: A basic system of soil classification for making and interpreting  
621 soil surveys. 2nd edition. Natural Resources Conservation Service. U.S. Department of  
622 Agriculture Handbook 436, 1999.
- 623 Soil Survey Staff.: Soil Survey Field and Laboratory Methods Manual. Soil Survey Investigations  
624 Report No. 51, Version 1.0. R. Burt (ed.). U.S. Department of Agriculture, Natural Resources  
625 Conservation Service. Available accessed at  
626 <https://www.nrcs.usda.gov/wps/portal/nrcs/detail/soils/ref/?cid=stelprdb1247805>, 2009.
- 627 Sun, L., An, G., Ding, L., and Shen, B.: A climatic analysis of summer precipitation features and  
628 anomaly in Northeast China. *Acta Meteorologica Sinica* 58(1), 70–82.  
629 <https://doi.org/10.11676/qxxb2000.007>, 2000.
- 630 Tang, K. L. (Eds.): *Soil and water conservation in China*. Beijing: Science Press, 2004.
- 631 Tran, D. Q., and Kurkalova, L. A.: Persistence in tillage decisions: Aggregate data analysis.  
632 *International Soil and Water Conservation Research*, 7(2), 109–118.  
633 <https://doi.org/10.1016/j.iswcr.2019.03.002>, 2019.
- 634 USDA-ARS.: *User's reference guide, Revised Universal Soil Loss Equation Version 2*  
635 [http://www.ars.usda.gov/sp2UserFiles/Place/64080510/RUSLE/RUSLE2\\_User\\_Ref\\_](http://www.ars.usda.gov/sp2UserFiles/Place/64080510/RUSLE/RUSLE2_User_Ref_Guide.pdf)  
636 [Guide.pdf](http://www.ars.usda.gov/sp2UserFiles/Place/64080510/RUSLE/RUSLE2_User_Ref_Guide.pdf). 2008.
- 637 USDA-ARS.: *Science documentation, Revised Universal Soil Loss Equation Version 2*  
638 [https://www.ars.usda.gov/ARSTUserFiles/60600505/RUSLE/RUSLE2\\_Science\\_Doc.pdf](https://www.ars.usda.gov/ARSTUserFiles/60600505/RUSLE/RUSLE2_Science_Doc.pdf).  
639 2013.
- 640 Van den Putte, A., Govers, G., Diels, J., Langhans, C., Clymans, W., Vanuytrecht, E., Merckx, R., and  
641 Raes, D.: Soil functioning and conservation tillage in the Belgian Loam Belt. *Soil & Tillage*  
642 *Research*, 122, 1–11. <https://doi.org/10.1016/j.still.2012.02.001>, 2012.
- 643 Vermang, J., Norton, L. D., Huang, C., Cornelis, W. M., da Silva, A. M., and Gabriels, D.:  
644 Characterization of soil surface roughness effects on runoff and soil erosion rates under  
645 simulated rainfall. *Soil Science Society of America Journal*, 79(3), 903–916.  
646 <https://doi.org/10.2136/sssaj2014.08.0329>, 2015.
- 647 Wang, L., Zheng, F.L., Liu, G., Zhang, X.J., Wilson, G.V., Shi, H.Q., and Liu X.J.: Seasonal changes  
648 of soil erosion and its spatial distribution on a long gentle hillslope in the Chinese Mollisol  
649 region. *International Soil and Water Conservation Research*, 9 (3), 394-404.  
650 <https://doi.org/10.1016/j.iswcr.2021.02.001>, 2021a.
- 651 Wang, L. C. (Eds.): *Theory and practice of maize with high-yielding potential in Jilin*. Beijing: Science  
652 Press, 2015.
- 653 Wang, L. H., Wang, Y. F., Saskia, K., Artemi, C., Ma, B., and Wu, F. Q.: Effect of soil management on  
654 soil erosion on sloping farmland during crop growth stages under a large-scale rainfall  
655 simulation experiment. *Journal of Arid Land*, 10(6), 921–931. [https://doi.org/10.1007/s40333-](https://doi.org/10.1007/s40333-018-0016-z)  
656 [018-0016-z](https://doi.org/10.1007/s40333-018-0016-z), 2018.
- 657 Wang, L. J., Zhang, Y. L., Jia, J. C., Zhen, Q. Z., and Zhang, X. C.: Effect of vegetation on the flow  
658 pathways of steep hillslopes: Overland flow plot-scale experiments and their implications.  
659 *Catena*, 204, 105438. <https://doi.org/10.1016/j.catena.2021.105438>, 2021b.
- 660 Wang, W., Deng, R., and Zhang, S.: Spatial pattern change and topographic differentia of gully erosion  
661 in the type black soil area of Northeast China during the past 40 years. *Geography and Geo-*  
662 *Information Science*, 28(3), 68–71. <https://doi.org/CNKI:SUN:DLGT.0.2012-03-018>, 2012.
- 663 Wang, Y.: Experimental Study of soil erosion by overland runoff in the rolling gullied Loess Region.  
664 *Soil and Water Conservation in China*, 5, 25–28. <https://doi.org/CNKI:SUN:ZGSB.0.1993-07->

- 665 007, 1993.
- 666 Wen, L. L., Zheng, F. L., Yang, Q. S., and Shen, H. O.: Effects of rainfall patterns on hillslope farmland  
667 erosion in black soil region of Northeast China. *Journal of Hydraulic Engineering*, 43(9),  
668 1084–1091. <https://doi.org/10.13243/j.cnki.slxb.2012.09.010>, 2012.
- 669 Xu, P., Wang, Y., and Fu, B.: Experimental research on the influence of two cultivation practices on  
670 rainfall runoff and (sandy and muddy) sediment generating processes in purple soil  
671 environment. *Chinese Journal of Geochemistry* 27(4), 370–376.  
672 <https://doi.org/CNKI:SUN:DQHB.0.2008-04-007>, 2008.
- 673 Xu, X. M., Zheng, F. L., Qin, C., Wu, H. Y., and Wilson, G. V.: Impact of cornstalk buffer strip on  
674 hillslope soil erosion and its hydrodynamic understanding. *Catena*, 149, 417–425.  
675 <https://doi.org/10.1016/j.catena.2016.10.016>, 2017.
- 676 Xu, X. M., Zheng, F. L., Wilson, G. V., He, C., Lu, J., and Bian, F.: Comparison of runoff and soil loss  
677 in different tillage systems in the Mollisol region of Northeast China. *Soil & Tillage Research*,  
678 177, 1–11. <https://doi.org/10.1016/j.still.2017.10.005>, 2018.
- 679 Xu, X. Z., Xu, Y., Chen, S. C., Xu, S. G., and Zhang, H. W.: Soil loss and conservation in the black  
680 soil region of Northeast China: a retrospective study. *Environmental Science & Policy*, 13(8),  
681 793–800. <https://doi.org/10.1016/j.envsci.2010.07.004>, 2010.
- 682 Yang, W. G., Han, Y., Zheng, F. L., Wang, Z. L., Yi, Y., and Feng, Z. Z.: Investigating spatial  
683 distribution of soil quality index and its impacts on corn yield in a cultivated catchment of the  
684 Chinese Mollisol Region. *Soil Science Society of America Journal*, 80(2), 317–327.  
685 <https://doi.org/10.2136/sssaj2015.09.0335>, 2016.
- 686 You, N. S., Dong, J. W., Huang, J. X., Du, G. M., Zhang, G. L., He, Y. L., Yang, T., Di, Y. Y., and Xiao,  
687 X. M.: The 10-m crop type maps in Northeast China during 2017-2019. *Scientific Data*, 8(1).  
688 <https://doi.org/10.1038/s41597-021-00827-9>, 2021.
- 689 Zhang, S. X., Li, Q., Lü, Y., Sun, X., Jia, S. X., Zhang, X. P., and Liang, W. J.: Conservation tillage  
690 positively influences the microflora and microfauna in the black soil of Northeast China. *Soil  
691 and Tillage Research*, 149, 46-52. <https://doi.org/10.1016/j.still.2015.01.001>, 2015.
- 692 Zhang, Y. B., Cao, N., Su, X. G., Xu, X. H., Yan, F., and Yang, Z. M.: Effects of soil and water  
693 conservation on soil properties in the Low Mountain and Hill Area of Jilin province. *Bulletin  
694 of Soil and Water Conservation*, 29(5), 224–229. [https://doi.org/CNKI:SUN:STT.0.2009-05-  
695 053](https://doi.org/CNKI:SUN:STT.0.2009-05-053), 2009a.
- 696 Zhang, Y. B., Zheng, F. L., and Wu, M.: Research progresses in agricultural non-point source pollution  
697 caused by soil erosion. *Advances in Water Science*, 18(1), 123–132.  
698 <https://doi.org/10.3321/j.issn:1001-6791.2007.01.021>, 2007.
- 699 Zhang, Y. B., Zheng, F. L., and Cao, N.: Effects of near-surface soil water conditions on agricultural  
700 non-point source pollutant transport. *Environmental Science*, 30(2), 376–383.  
701 <https://doi.org/10.13227/j.hjx.2009.02.050>, 2009b.
- 702 Zhang, Y. F., Wang, X. P., Hu, R., Pan, Y. X., and Paradeloc, M.: Rainfall partitioning into throughfall,  
703 stemflow and interception loss by two xerophytic shrubs within a rain-fed re-vegetated desert  
704 ecosystem, northwestern China. *Journal of Hydrology*, 527, 1084–1095.  
705 <https://doi.org/10.1016/j.jhydrol.2015.05.060>, 2015.
- 706 Zhang, Y. G., Nearing, M. A., Zhang, X. C., Xie, Y., and Wei, H.: Projected rainfall erosivity changes  
707 under climate change from multimodel and multiscenario projections in Northeast China.  
708 *Journal of Hydrology*, 384(1–2), 97–106. <https://doi.org/10.1016/j.jhydrol.2010.01.013>, 2010.
- 709 Zhao, J. F., Guo, J. P., Xu, Y. L., and Mu, J.: Effects of climate change on cultivation patterns of spring  
710 maize and its climatic suitability in Northeast China. *Agriculture Ecosystems & Environment*,  
711 202, 178–187. <https://doi.org/10.1016/j.agee.2015.01.013>, 2015.
- 712 Zhao, S. (Eds.): *Physical geography of China*. Beijing: Science Press and John Wiley, 1986.
- 713 **Zheng, F. L. (Eds.): *Characteristics and control on the hybrid soil erosion in Chinese Mollisols*.  
714 Beijing: Science Press, 2020.**

715 **Figure Legends**

716 **Figure 1.** Field scenario at the maize seedling stage in the Mollisols of Northeast China.

717

718 **Figure 2.** Experimental plots, status, and rainfall setup.

719

720 **Figure 3.** Rainfall intensity calibration and small splash-cup positions. (a) Rainfall intensity calibration  
721 performed every time before rainfall experiment. (b) Positions for small splash-cups in plots with  
722 vertical ridges. (c) Positions for small splash-cups in plots with horizontal ridges.

723

724 **Figure 4.** Runoff amount under different tillage measures. **CK (control)**, flat-planting without ridges  
725 and mulching; Hr, horizontal ridging without mulching; Vr, vertical ridging without mulching; Cm,  
726 flat-planting and mulching without ridges; Hr+Cm, horizontal ridging with mulching; Vr+Cm, vertical  
727 ridging with mulching. The vertical error bars indicate LSD at  $P<0.05$ . Note: The asterisk (\*) indicates  
728 ridge rupture.

729

730 **Figure 5.** Soil loss amount under different tillage measures. **CK (control)**, flat-planting without ridges  
731 and mulching; Hr, horizontal ridging without mulching; Vr, vertical ridging without mulching; Cm,  
732 cornstalk mulching; Hr+Cm, horizontal ridging with mulching; Vr+Cm, vertical ridging with  
733 mulching. The vertical error bars indicate LSD at  $P<0.05$ . Note: The asterisk (\*) indicates ridge  
734 rupture.

735

736 **Figure 6.** Runoff rate under different tillage measures. **CK (control)**, flat-planting without ridges and  
737 mulching; Hr, horizontal ridging without mulching; Vr, vertical ridging without mulching; Cm,  
738 cornstalk mulching; Hr+Cm, horizontal ridging with mulching; Vr+Cm, vertical ridging with  
739 mulching.

740

741 **Figure 7.** Soil loss rate under different tillage measures. CK (control), flat-planting without ridges and  
742 mulching; Hr, horizontal ridging without mulching; Vr, vertical ridging without mulching; Cm,  
743 cornstalk mulching; Hr+Cm, horizontal ridging with mulching; Vr+Cm, vertical ridging with  
744 mulching.

745

746 **Figure 8.** Correlation between soil loss and influencing factors (a), correlation of soil loss amount and  
747 soil splash-detachment; (b), correlation of soil loss amount and splash-transport amount; (c),  
748 correlation of soil loss amount and runoff loss amount; d. correlation of soil loss amount and runoff  
749 velocity. Note: Correlations between total soil loss amount and four inferred influencing factors; The  
750 symbol ▲ indicates ridge rupture during the rainfall experiment.

751



752 Table 1. Effect of canopy on kinetic energy

|       | 50 mm h <sup>-1</sup>                  |         | 100 mm h <sup>-1</sup> |          |
|-------|----------------------------------------|---------|------------------------|----------|
|       | CM                                     | CT      | CM                     | CT       |
|       | kinetic energy, J/(m <sup>2</sup> ·mm) |         |                        |          |
| above |                                        | 16.43 c |                        | 18.19 a  |
| below | 15.78 d                                | 15.84 d | 17.25 b                | 17.38 b  |
|       | total kinetic energy, J/m <sup>2</sup> |         |                        |          |
| above |                                        | 196.5 d |                        | 407.64 a |
| below | 174.05 e                               | 178.2 e | 357.97 c               | 367.1 b  |

753 CM, conservation tillage measures, including Cm, cornstalk mulching without ridges; Hr, horizontal  
 754 ridging without mulching; Vr+Cm, vertical ridging with mulching; Hr+Cm, horizontal ridging with  
 755 mulching. CT, conventional tillage practices, including control (CK), flat-planting without ridges and  
 756 mulching, and Vr, vertical ridging without mulching.

757 Values followed by different letters are significantly different at  $P < 0.05$  according to the LSD test.

758 Table 2

759 Effect of canopy on raindrop diameter

| Raindrop diameter, mm | 50 mm h <sup>-1</sup> , % |       | 100 mm h <sup>-1</sup> , % |       |
|-----------------------|---------------------------|-------|----------------------------|-------|
|                       | above                     | below | above                      | below |
| 0.5–1                 | 3.16                      | 2.08  | 5.02                       | 3.01  |
| 1–1.5                 | 32.81                     | 29.87 | 35.97                      | 34.99 |
| 1.5–2.0               | 19.96                     | 17.96 | 22.99                      | 21.00 |
| 2.0–2.5               | 20.95                     | 19.95 | 17.00                      | 21.99 |
| 2.5–3                 | 12.06                     | 13.99 | 10.01                      | 13.00 |
| 3–3.5                 | 11.07                     | 13.00 | 9.01                       | 5.01  |
| 3.5–4                 | 0                         | 2.08  | 0                          | 1.01  |
| 4–4.5                 | 0                         | 1.08  | 0                          | 0     |

760

761 Table 3

762 Runoff-yielding time and runoff velocity under different tillage practices.

| Treatment | Runoff-yielding time (s) |                  | Runoff velocity ( $10^{-2}$ m s $^{-1}$ ) |                  |
|-----------|--------------------------|------------------|-------------------------------------------|------------------|
|           | 50 mm h $^{-1}$          | 100 mm h $^{-1}$ | 50 mm h $^{-1}$                           | 100 mm h $^{-1}$ |
| CK        | 129 d                    | 69 e             | 5.83 b                                    | 17.95 a          |
| Cm        | 611 b                    | 260 c            | 1.41 c                                    | 3.07 c           |
| Vr        | 132 d                    | 71 e             | 8.76 a                                    | 19.77 a          |
| Hr        | 1700 a                   | 1332 b           | 0.96 d                                    | 5.12 b           |
| Vr+Cm     | 374 c                    | 154 d            | 1.64 c                                    | 4.01 b           |
| Hr+Cm     | NA                       | 1634 a           | NA                                        | 0.65 d           |

763 CK, control, flat-planting without ridges and mulching; Cm, cornstalk mulching without ridges; Vr,  
764 ridging without mulching; Hr, horizontal ridging without mulching; Vr+Cm, vertical ridging with  
765 mulching; Hr+Cm, horizontal ridging with mulching; NA, Hr+Cm-treated plots prevented runoff  
766 throughout the rainfall experiment.

767 Values in the same column followed by different letters are significantly different at  $P < 0.05$  according  
768 to the LSD test.

769 Table 4

770 Splash-detachment and splash-transport under different tillage practices.

| Treatment               |       | 50 mm h <sup>-1</sup>                      |                                           |                          | 100 mm h <sup>-1</sup>                     |                                           |                          |
|-------------------------|-------|--------------------------------------------|-------------------------------------------|--------------------------|--------------------------------------------|-------------------------------------------|--------------------------|
|                         |       | Splash-<br>detachment,<br>g/m <sup>2</sup> | Splash-<br>transport,<br>g/m <sup>2</sup> | Ratio of<br>transport, % | Splash-<br>detachment,<br>g/m <sup>2</sup> | Splash-<br>transport,<br>g/m <sup>2</sup> | Ratio of<br>transport, % |
| Conventional<br>tillage | CK    | 377.55                                     | 40.39                                     | 10.70                    | 1750.25                                    | 245.94                                    | 14.05                    |
|                         | Vr    | 386.13                                     | 36.69                                     | 9.50                     | 1695.67                                    | 212.93                                    | 12.56                    |
| Conservation<br>tillage | Cm    | 7.97                                       | 0.67                                      | 8.35                     | 9.90                                       | 1.60                                      | 16.11                    |
|                         | Hr    | 369.24                                     | 43.18                                     | 11.69                    | 1723.74                                    | 226.26                                    | 13.13                    |
|                         | Vr+Cm | 6.16                                       | 0.76                                      | 12.31                    | 11.63                                      | 1.97                                      | 16.93                    |
|                         | Hr+Cm | 7.92                                       | 0.81                                      | 10.23                    | 13.65                                      | 1.86                                      | 13.63                    |

771 CK, control, flat-planting without ridges and mulching; Cm, cornstalk mulching without ridges; Vr,  
 772 ridging without mulching; Hr, horizontal ridging without mulching; Vr+Cm, vertical ridging with  
 773 mulching; Hr+Cm, horizontal ridging with mulching.

774 Table 5

775 Change in soil water content on soil profile pre- and post-rainfall and infiltration under different

776 tillage practices

| Treatments              |     | Depth,<br>cm | 50 mm h <sup>-1</sup> |                   |                   |                      | 100 mm h <sup>-1</sup> |                   |                   |                      |  |
|-------------------------|-----|--------------|-----------------------|-------------------|-------------------|----------------------|------------------------|-------------------|-------------------|----------------------|--|
|                         |     |              | Soil water content, % |                   |                   | Infiltrati<br>on, mm | Soil water content, %  |                   |                   | Infiltrati<br>on, mm |  |
|                         |     |              | Pre-<br>rainfall      | Post-<br>rainfall | Rising<br>rate, % |                      | Pre-<br>rainfall       | Post-<br>rainfall | Rising<br>rate, % |                      |  |
| Conventional<br>tillage | CK  | 0–5          | 21.22                 | 25.04             | 17.99             | 26.4                 | 25.17                  | 30.19             | 19.90             | 36.69                |  |
|                         |     | 5–10         | 26.59                 | 28.19             | 5.99              |                      | 27.48                  | 28.51             | 3.78              |                      |  |
|                         |     | 10–20        | 22.15                 | 22.33             | 0.81              |                      | 25.64                  | 25.93             | 1.15              |                      |  |
|                         | Vr  | 0–5          | 24.25                 | 27.69             | 14.18             | 24.42                | 25.50                  | 29.71             | 16.52             | 35.34                |  |
|                         |     | 5–10         | 24.10                 | 25.63             | 6.37              |                      | 29.54                  | 33.24             | 12.53             |                      |  |
|                         |     | 10–20        | 22.88                 | 23.18             | 1.32              |                      | 27.67                  | 28.31             | 2.32              |                      |  |
| Conservation<br>tillage | Cm  | 0–5          | 27.19                 | 29.31             | 7.80              | 31.98                | 27.79                  | 33.19             | 19.44             | 45.81                |  |
|                         |     | 5–10         | 31.00                 | 33.33             | 7.50              |                      | 27.89                  | 30.29             | 8.59              |                      |  |
|                         |     | 10–20        | 27.19                 | 29.07             | 6.90              |                      | 25.55                  | 27.04             | 5.81              |                      |  |
|                         | Hr  | 0–5          | 27.56                 | 35.67             | 29.42             | 44.16                | 23.64                  | 32.69             | 38.30             | 65.58                |  |
|                         |     | 5–10         | 27.62                 | 32.12             | 16.30             |                      | 28.17                  | 30.62             | 8.69              |                      |  |
|                         |     | 10–20        | 25.22                 | 27.65             | 9.64              |                      | 24.52                  | 27.48             | 12.07             |                      |  |
|                         | Vr+ | 0–5          | 28.54                 | 32.65             | 14.39             | 33.18                | 29.20                  | 34.74             | 18.96             | 44.28                |  |
|                         |     | Cm           | 5–10                  | 31.39             | 34.69             | 10.51                |                        | 29.22             | 33.12             | 13.33                |  |
|                         |     |              | 10–20                 | 23.45             | 25.94             | 10.62                |                        | 29.78             | 32.68             | 9.74                 |  |
|                         | Hr+ | 0–5          | 27.70                 | 35.28             | 27.38             | 44.76                | 28.13                  | 36.54             | 29.90             | 71.64                |  |
|                         |     | Cm           | 5–10                  | 30.11             | 34.18             | 13.52                |                        | 30.98             | 34.65             | 11.85                |  |
|                         |     |              | 10–20                 | 25.34             | 29.81             | 17.64                |                        | 27.96             | 30.49             | 9.02                 |  |

777 CK, control, flat-planting without ridges and mulching; Cm, cornstalk mulching; Vr, vertical ridges

778 without mulching; Hr, horizontal ridges without mulching; Vr+Cm, vertical ridges with mulching;

779 Hr+Cm, horizontal ridges with mulching.

780

781

782

783 **Figure 1.** Field scenario at the maize seedling stage in the Mollisols of Northeast China.

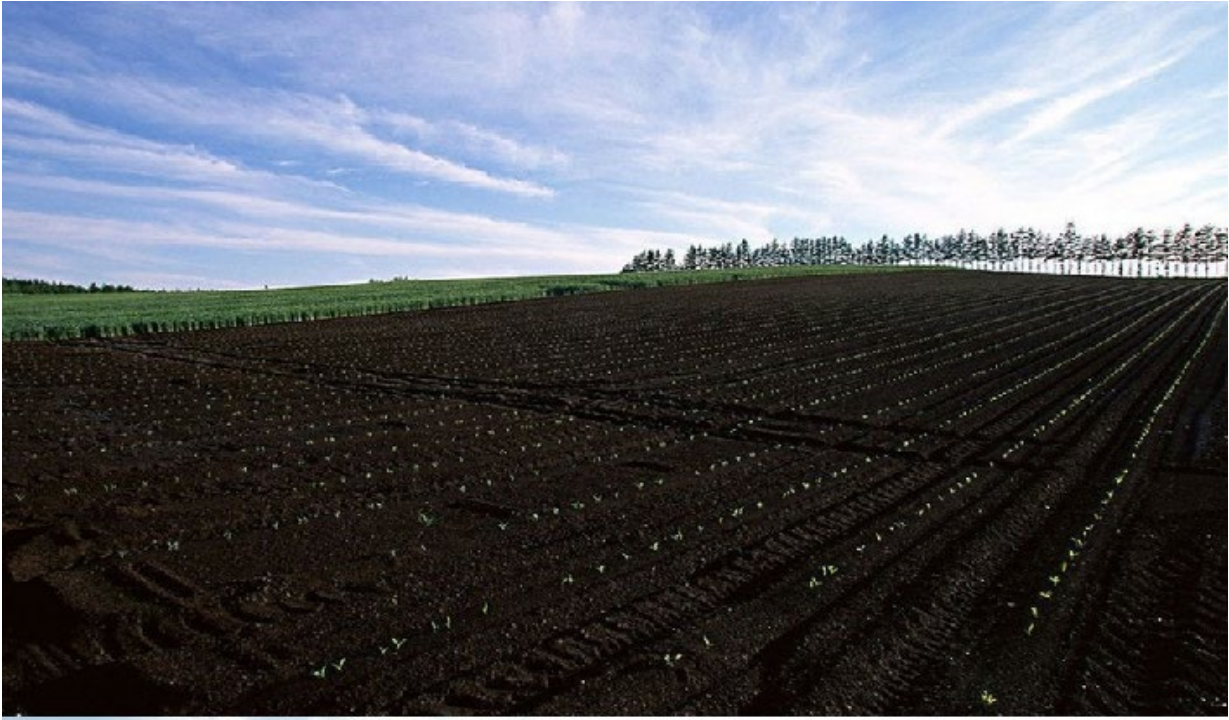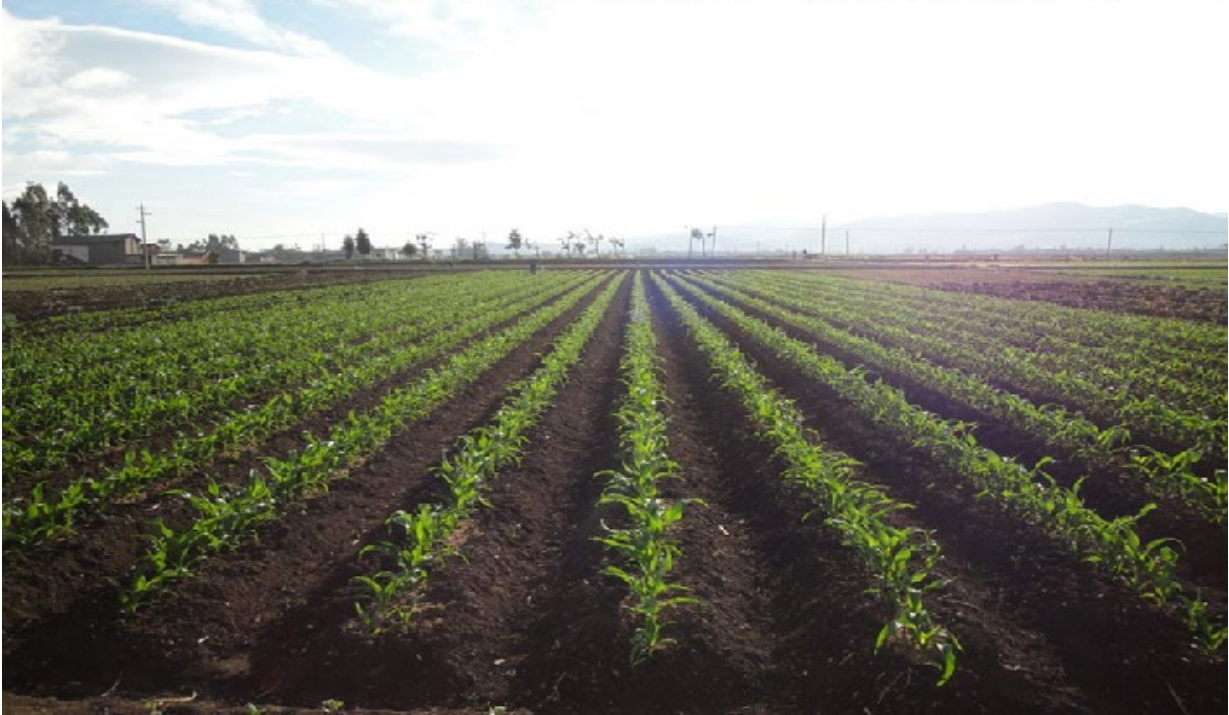

784

785

786

787

788

789 **Figure 2.** Experimental plots, status, and rainfall setup.

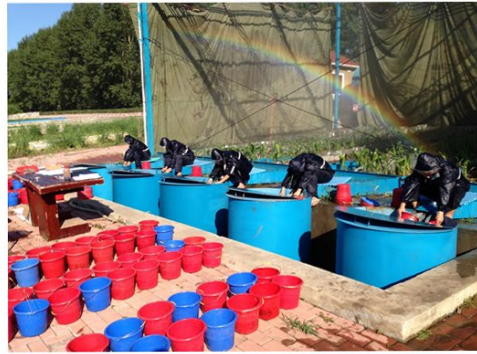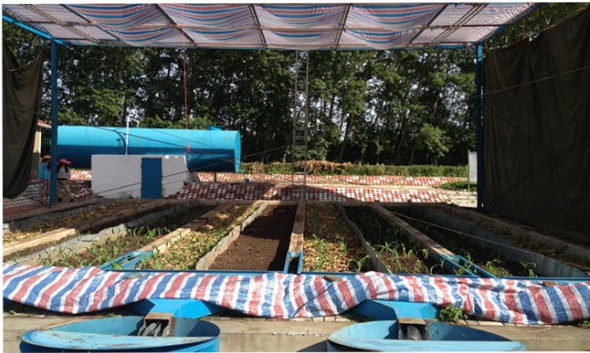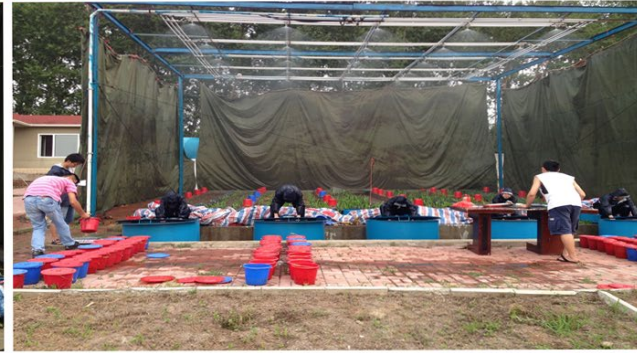

790

791

792

793

794

795

796

797

798

799

800

801

802

803

804

805 **Figure 3.** Rainfall intensity calibration and small splash-cup positions. (a) Rainfall intensity  
806 calibration performed every time before rainfall experiment. (b) Positions for small splash-cups in  
807 plots with vertical ridges. (c) Positions for small splash-cups in plots with horizontal ridges.

808

809

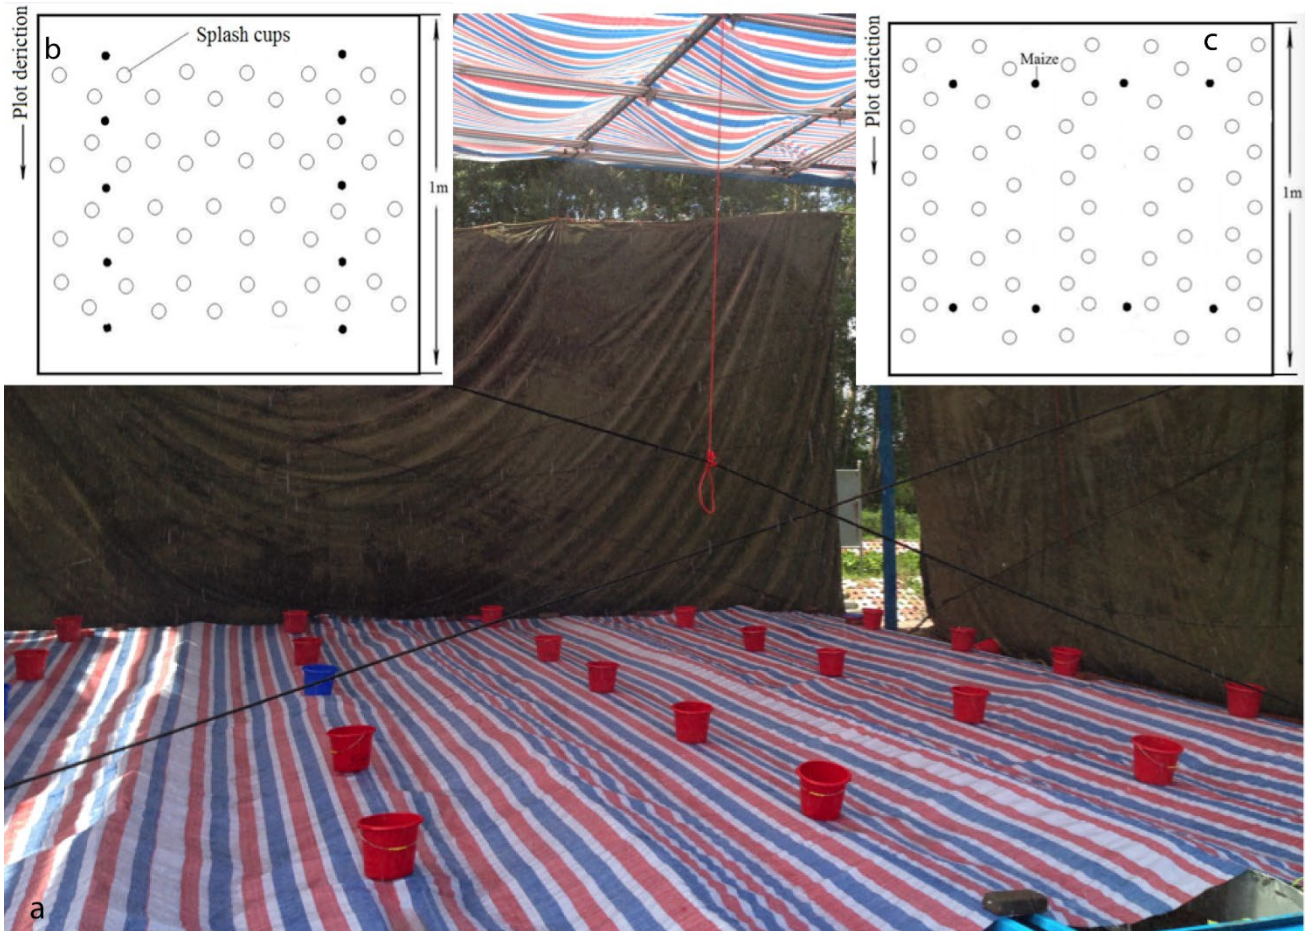

810

811

812

813

814

815

816

817



818 **Figure 4.** Runoff amount under different tillage measures. **CK (control)**, flat-planting without ridges  
 819 and mulching; Hr, horizontal ridging without mulching; Vr, vertical ridging without mulching; Cm,  
 820 flat-planting and mulching without ridges; Hr+Cm, horizontal ridging with mulching; Vr+Cm,  
 821 vertical ridging with mulching. The vertical error bars indicate LSD at  $P<0.05$ . Note: The asterisk (\*)  
 822 indicates ridge rupture.

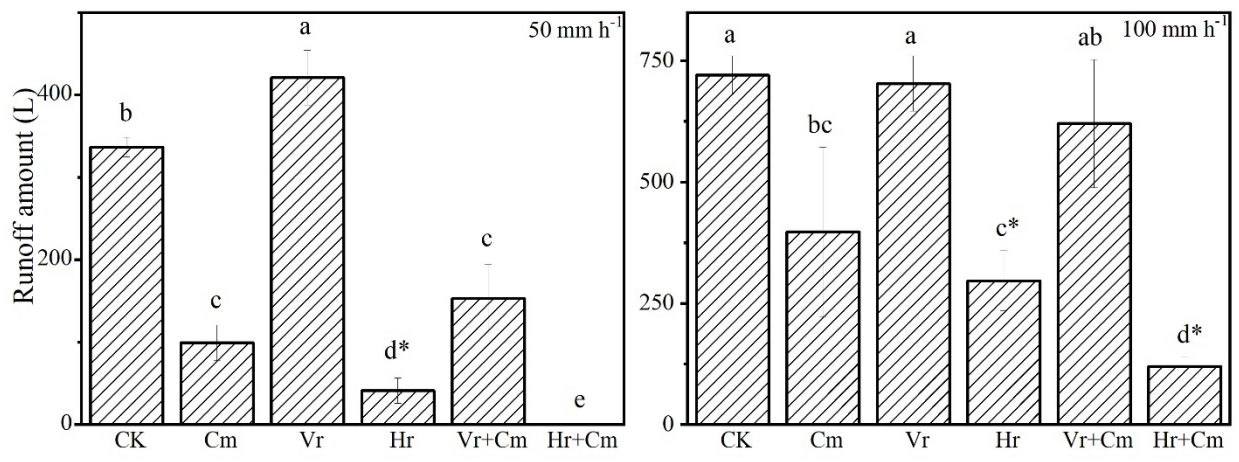

823  
 824  
 825  
 826  
 827  
 828  
 829

830 **Figure 5.** Soil loss amount under different tillage measures. **CK (control)**, flat-planting without  
 831 ridges and mulching; Hr, horizontal ridging without mulching; Vr, vertical ridging without mulching;  
 832 Cm, cornstalk mulching; Hr+Cm, horizontal ridging with mulching; Vr+Cm, vertical ridging with  
 833 mulching. The vertical error bars indicate LSD at  $P<0.05$ . Note: The asterisk (\*) indicates ridge  
 834 rupture.

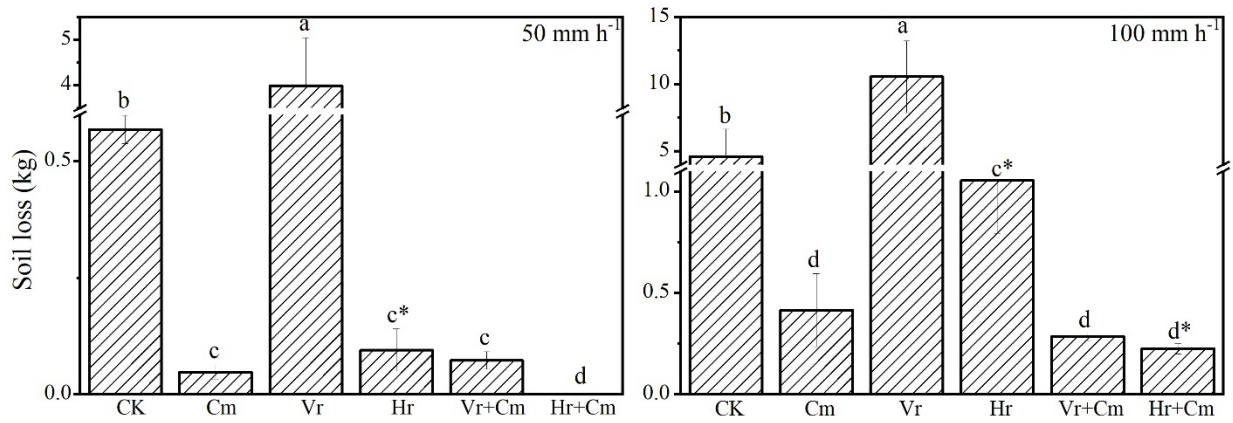

835  
 836  
 837  
 838  
 839  
 840  
 841  
 842

843 **Figure 6.** Runoff rate under different tillage measures. CK (control), flat-planting without ridges and  
 844 mulching; Hr, horizontal ridging without mulching; Vr, vertical ridging without mulching; Cm,  
 845 cornstalk mulching; Hr+Cm, horizontal ridging with mulching; Vr+Cm, vertical ridging with  
 846 mulching.

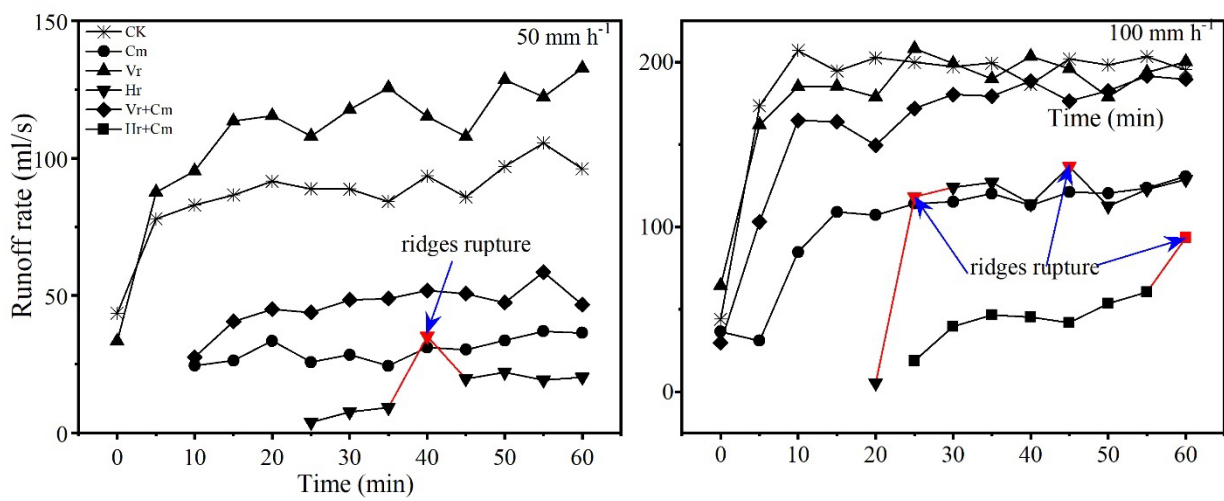

847  
 848  
 849  
 850  
 851  
 852  
 853  
 854

855 **Figure 7.** Soil loss rate under different tillage measures. **CK (control)**, flat-planting without ridges  
 856 and mulching; Hr, horizontal ridging without mulching; Vr, vertical ridging without mulching; Cm,  
 857 cornstalk mulching; Hr+Cm, horizontal ridging with mulching; Vr+Cm, vertical ridging with  
 858 mulching.

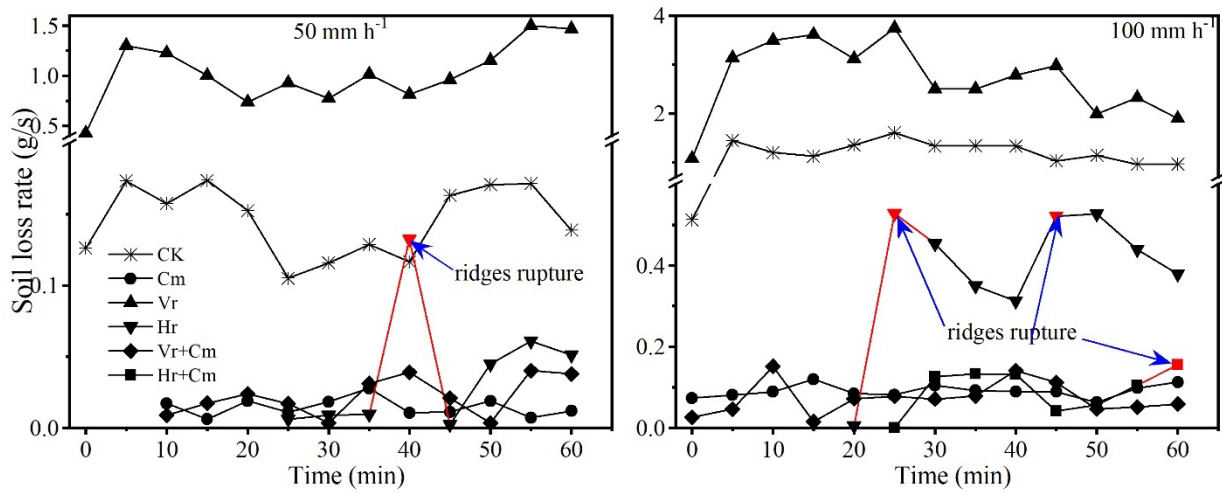

859

860

861

862

863

864

865

866

867 **Figure 8.** Correlation between soil loss and influencing factors (a), correlation of soil loss amount  
 868 and soil splash-detachment; (b), correlation of soil loss amount and splash-transport amount; (c),  
 869 correlation of soil loss amount and runoff loss amount; d. correlation of soil loss amount and runoff  
 870 velocity. Note: Correlations between total soil loss amount and four inferred influencing factors; The  
 871 symbol ▲ indicates ridge rupture during the rainfall experiment.

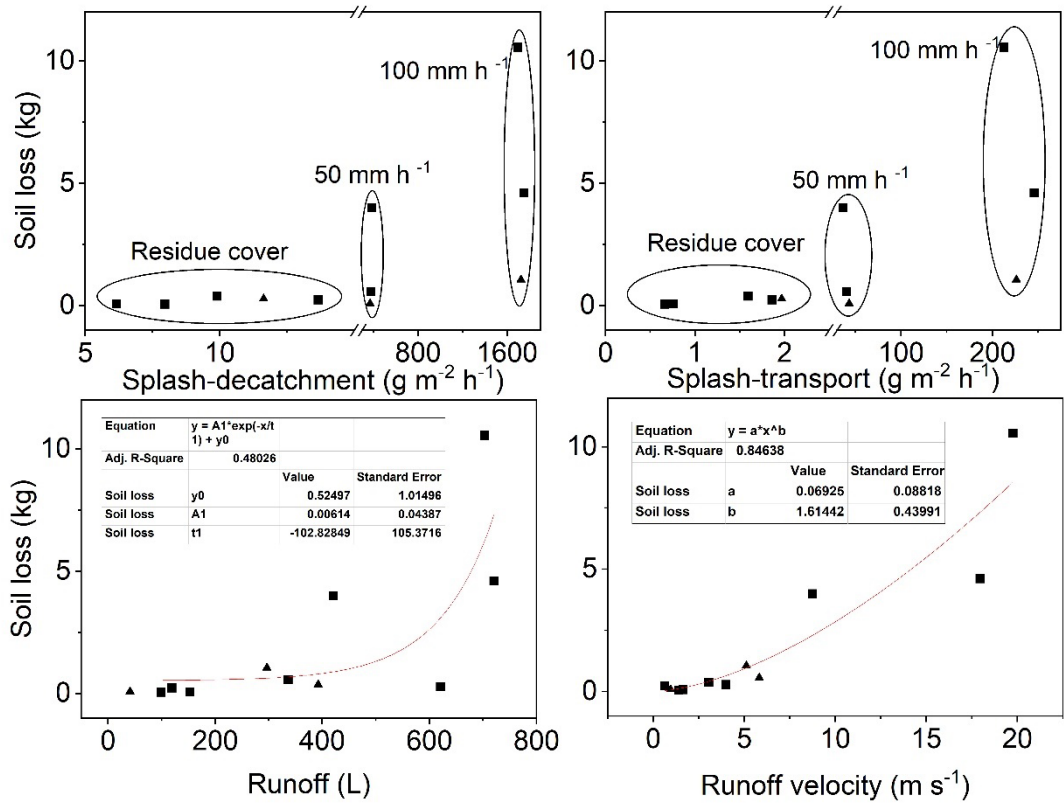

872

873
